1 **Original Research Article**

2 **Proteomic analysis of liver tissue reveals *Aeromonas hydrophila* infection mediated**  
3 **modulation of host metabolic pathways in *Labeo rohita***

4 Mehar Un Nissa<sup>1</sup>, Nevil Pinto<sup>2</sup>, Biplab Ghosh<sup>3</sup>, Urvi Singh<sup>4</sup>, Mukunda Goswami<sup>2\*</sup> and  
5 Sanjeeva Srivastava<sup>1\*</sup>

6 <sup>1</sup>Department of Biosciences and Bioengineering, Indian Institute of Technology Bombay,  
7 Powai, Mumbai 400076, India

8 <sup>2</sup>Central Institute of Fisheries Education, Indian Council of Agricultural Research, Versova,  
9 Mumbai, Maharashtra 400061

10 <sup>3</sup>Regional Centre for Biotechnology, Faridabad, 121001, India

11 <sup>4</sup>Department of Biochemistry, Sri Venkateswara College, University of Delhi, India

12 \*Correspondence for proteomics work: Dr. Sanjeeva Srivastava, E-mail: [sanjeeva@iitb.ac.in](mailto:sanjeeva@iitb.ac.in),

13 Phone: +91-22-2576-7779, Fax: +91-22-2572-3480

14 \*Correspondence for fish work: Dr. Mukunda Goswami, E-mail: [mukugoswami@gmail.com](mailto:mukugoswami@gmail.com)

15

16

17

18

19

20

21

22

23

24

25

26 **ABSTRACT**

27 *Aeromonas hydrophila* (*Ah*) is an opportunistic Gram-negative bacterium and a serious global  
28 pathogen causing Motile Aeromonas Septicaemia (MAS) in fish and many other vertebrates.  
29 The pathogenesis of aeromonas septicaemia is complex and involves multiple perturbed  
30 pathways. Molecular analysis of host tissues could be a powerful approach to identify  
31 mechanistic and diagnostic immune signatures of disease. We performed a deep proteomic  
32 analysis of *Labeo rohita* liver tissue to examine changes in the host proteome during *Ah*  
33 infection. A total of 2525 proteins were identified of which 158 were found differentially  
34 expressed during *Ah* infection. Functional analysis of significant proteins identified the  
35 dysregulation of several metabolic enzymes, antioxidative proteins, cytoskeletal proteins and  
36 immune related proteins. Proteomic analysis revealed the alterations in the cellular defence  
37 mechanisms including phagolysosomal killing and apoptosis during *Ah* infection. Our systemic  
38 approach revealed the protein dynamics in the host cells to explore the putative biological  
39 processes underlying the metabolic reprogramming of the host cells during *Ah* infection. Our  
40 findings paved the way for future research into the role of Toll-like receptors (Tlr3), C-type  
41 lectins (Clec4e) and metabolic enzymes in *Ah* pathogenesis leading towards host directed  
42 immunotherapies to tackle the *Ah* infection in fish.

43 **IMPORTANCE**

44 Bacterial disease is one of the most serious problems in aquaculture industry. *Aeromonas*  
45 *hydrophila* (*Ah*), a Gram-negative bacterium causes motile aeromonas septicaemia (MAS) in  
46 fish. Small molecules that target the metabolism of the host have recently emerged as potential  
47 treatment possibilities in infectious diseases. However, the ability to develop new therapies is  
48 hampered due to lack of knowledge about pathogenesis mechanisms and host-pathogen  
49 interactions. Molecular level analysis of host tissues could be helpful in finding mechanistic  
50 immunological markers of diseases. We examined alterations in the host proteome during *Ah*

51 infection in *Labeo rohita* liver tissue to find cellular proteins and processes affected by *Ah*  
52 infection. Our systemic approach revealed protein dynamics underlying the host cells'  
53 metabolic reprogramming during *Ah* infection. Our work is an important step towards  
54 leveraging host metabolism in targeting the disease by providing a bigger picture on proteome  
55 pathology correlation during *Ah* infection.

56 **Keywords:** *Aeromonas hydrophila*, Liver proteomics, reprogramming, mass spectrometry,  
57 rohu

58 **Abbreviations:**

|                 |                                                               |
|-----------------|---------------------------------------------------------------|
| <b>Aars</b>     | Alanine--tRNA ligase OS                                       |
| <b>Atp2b1</b>   | Calcium-transporting ATPase                                   |
| <b>Atp6v1a</b>  | H(+)-transporting two-sector ATPase                           |
| <b>Atp6voc</b>  | V-type proton ATPase proteolipid subunit                      |
| <b>Atp8</b>     | ATP synthase protein 8 OS                                     |
| <b>Cpt1</b>     | Carnitine O-palmitoyltransferase OS                           |
| <b>Cyp1a</b>    | Unspecific monooxygenase OS                                   |
| <b>Cyp2f2</b>   | Cytochrome P450 2F2-like protein OS                           |
| <b>Cyp2g1</b>   | Cytochrome P450 2G1-like protein                              |
| <b>Cyp3a</b>    | Cytochrome P450 3A30-like protein OS                          |
| <b>Eprs</b>     | Glutamyl-tRNA synthetase OS                                   |
| <b>Fabp</b>     | Fatty acid-binding brain-like protein OS                      |
| <b>Hsp90aa1</b> | Heat shock HSP 90-alpha OS                                    |
| <b>Hspa8</b>    | Heat shock cognate 71 kDa OS                                  |
| <b>Mogs</b>     | Mannosyl-oligosaccharide glucosidase-like protein OS          |
| <b>Ndufa12</b>  | NADH dehydrogenase [ubiquinone] 1 alpha subcomplex subunit 12 |
| <b>Ndufa2</b>   | Complex I-B8 OS                                               |
| <b>Ndufa6</b>   | Complex I-B14                                                 |
| <b>Ndufb10</b>  | Complex I-PDSW OS                                             |
| <b>Ndufb6</b>   | Complex I-B17                                                 |
| <b>Ndufs8</b>   | Complex I-23kD                                                |
| <b>Ndufv2</b>   | NADH dehydrogenase [ubiquinone] flavoprotein 2, mitochondrial |
| <b>Pasma1</b>   | Proteasome subunit alpha type-1                               |
| <b>Pasma5</b>   | Proteasome subunit alpha type OS                              |
| <b>Pasma8</b>   | Proteasome subunit alpha type OS                              |
| <b>Psmb4</b>    | Proteasome subunit beta                                       |
| <b>Psmd3</b>    | 26S proteasome non-ATPase regulatory subunit 3 OS             |
| <b>Psmd6</b>    | 26S proteasome non-ATPase regulatory subunit 6 OS             |
| <b>Qars</b>     | Glutamine--tRNA ligase OS                                     |
| <b>Rpl13</b>    | 60S ribosomal protein L13 OS                                  |
| <b>Rpl7a</b>    | 60S ribosomal protein L7a OS                                  |

|               |                                       |
|---------------|---------------------------------------|
| <b>Rplp2</b>  | 60S acidic ribosomal protein P2 OS    |
| <b>Rps6</b>   | 40S ribosomal protein S6 OS           |
| <b>Rrbp1</b>  | Ribosome-binding 1-like isoform X1 OS |
| <b>Scp2</b>   | Acetyl-CoA C-myristoyltransferase OS  |
| <b>Sec31a</b> | Transport Sec31A-like isoform X5 OS   |
| <b>TCEP</b>   | Tris(2-carboxyethyl)phosphine         |
| <b>Tlr4</b>   | Toll-like receptor 4                  |

59

60

61

62

63

64

65

66

67

68

69

70

71

72

73

74

## 75 INTRODUCTION

76 The intensification of aquaculture system leads to the occurrence of diseases that reduce the  
77 quality of fish and fishery products and in turn cause economic loss. Aquaculture is  
78 experiencing a massive loss of production due to a variety of reasons of which more than 50%  
79 are due to diseases especially in developing countries (1). Aeromonads have been recognised  
80 as the most common bacterial pathogens responsible for bacterial fish diseases. Aeromonads  
81 include *Aeromonas hydrophila* (*Ah*), *A. veronii*, *A. sobria*, and *A. caviae* which harm a wide  
82 range of hosts (2). Among these, *Ah* is highly infective and results in economic loss at alarming  
83 levels (3). *Ah* is a gram-negative opportunistic pathogen. Infectious signs of dropsy,  
84 hemorrhages, ulcers and necrosis have been observed in all stages of carps and other freshwater  
85 fish species like *Arapaima gigas*, Nile tilapia (*Oreochromis niloticus*) and catfish (4–7).

86 Proteomic analysis has become crucial for understanding the fundamental mechanisms  
87 of bacterial resistance and virulence. This has resulted in a greater understanding of pathogen  
88 biology and interaction with host that can be well addressed through holistic approaches like  
89 proteomics (8). Proteomics approaches have been utilised to explore the antibiotic resistance  
90 mechanism in *Ah*. With the help of proteomic approaches, it has been reported that the  
91 quinolones resistance in *Ah* might involve increased expression of SOS response-related  
92 proteins while decreasing those of chemotaxis (9). Further, the proteomic analysis of carp  
93 intestinal mucosa revealed that the differentially expressed proteins belong to MHC II protein  
94 complex and immune response, throwing light on the metabolic processes that are important  
95 during *Ah* infection (10). In *Ah* infected Wuchang bream (*Megalobrama amblycephala*),  
96 proteomic analysis of hepatopancreas revealed that *Ah* infection affected antioxidative proteins  
97 through complex regulatory mechanisms and decreased immunological ability (11). In the gills  
98 of Zebrafish, mucosal immune response was found enhanced during *Ah* infection (12).

99 Fish majorly depend on their innate immune system as their first line of defense which  
100 is an important factor in disease resistance (13). *Ah* infections cause changes in the host  
101 metabolism, but the mechanisms that determine the nature and severity of these changes are  
102 still not known completely. In order to explore the infection mediated metabolic changes in the  
103 host, we performed proteomic analysis of liver tissue of *Ah* infected *Labeo rohita*. *L. rohita* is  
104 the most important aquaculture species among the three Indian major carp species in  
105 polyculture system. Liver is a metabolically active tissue and has been recognized as a central  
106 immunological organ with high exposure to circulating antigens and endotoxins from the gut  
107 microbiota, particularly enriched for innate immune cells (14). This study focussed on  
108 proteomic characterisation of infected liver to understand *Ah* pathogenesis and to look into the  
109 physiological changes and host response to *Ah* infection.

110

111

112

113

114

115

116

117

118

119

## 120 RESULTS

### 121 *Aeromonas hydrophila* infection alters proteomic profile in host liver tissue

122 Discovery based proteomics data was acquired for eight samples (Details in Material and  
123 Methods) through high resolution mass spectrometry and a label-free quantitation (LFQ)  
124 approach was utilised for detection and quantification of the host proteins. The significantly  
125 altered proteins ( $p$ -value 0.05) were considered for the identification of the best panel of  
126 proteins to differentiate the control and *Ah* infected group. Further using a targeted mass  
127 spectrometry-based approach of selected/multiple reaction monitoring (SRM/MRM), selected  
128 protein targets were validated where data was acquired for eleven samples (five AH and six  
129 Control). Finally, we looked into how *Ah* (*Ah*) infection impacted the host's physiological  
130 processes (Fig. 1).

131 Comparison of proteomic profiles from uninfected and infected liver tissue was  
132 performed to define changes to the host proteome during *Ah* infection. After analysing through  
133 label-free quantification approach, on an average ~1650 proteins were quantified in each  
134 replicate (Table S1) except one of the samples from infected group (AH1) which was removed  
135 from downstream analysis because of poor mass spectrometric results compared to other  
136 samples (Fig. S1A-B). Further statistical analysis was performed for 7 out of 8 samples; four  
137 of the control samples (Liv-C1 to Liv-C4) and three infected samples (Liv-AH2 to Liv-AH4).  
138 We observed 390 proteins to be enriched in control group (viz. quantified in at least 75% of  
139 control samples and not detected or detected in less than 33% samples of AH condition) and  
140 concurrently 113 proteins were enriched in AH group (*Ah* infected) which might be a reflection  
141 of different proteome expression under healthy and diseased condition (Fig. S1C, Table S1).  
142 Differential expression analysis was performed for 1157 overlapped proteins between the two  
143 groups. In comparison to the control group, we observed that in the *Ah* infected group, 59  
144 proteins exhibited a decreased abundance while 98 proteins showed an increased abundance

145 representing a total of 157 dysregulated proteins during *Ah* infection (Fig. 2A, Table S1) (see  
146 Materials and Methods for significance threshold values). We employed Partial Least Squares  
147 Discriminant Analysis (PLS-DA) to identify the proteins that can distinguish the AH group (*Ah*  
148 infected) from the Control group on the basis of variable importance in projection (VIP) Score.  
149 Top 30 features (proteins) that can clearly classify between two groups are represented (Fig.  
150 2B). Unsupervised hierarchical clustering analysis clearly clustered the samples with similar  
151 abundance profiles and stratified the bacterial infected and control group as represented for top  
152 30 features (Fig. 2C). Proteins that could differentiate the infected group from control group  
153 mapped to diverse molecular functions as described below. Comparative protein abundances  
154 for few of the differentially expressed proteins is represented in Fig. 2D including  
155 Metalloreductase STEAP4 (Steap4), Glutamine gamma-glutamyltransferase (Tgm1) and  
156 Actin-related protein 2 (Actr2) showing increased abundance and Biotinidase (Btd), Toll-like  
157 receptor 3 (Tlr3), Antithrombin-III-like isoform X1 (Serpinc1) proteins showing a decreased  
158 abundance as a result of *Ah* infection.

159         Differentially expressed proteins (DEPs) along with the proteins quantified only in one  
160 group (i.e., Control enriched or AH enriched) were considered for functional analysis (gene  
161 ontology) to further look into their biological association. Proteins that showed decreased  
162 abundance in AH group (*Ah* infected) belong to the processes like metabolism of amino acids,  
163 endopeptidase and peptidase activity, lysosomal processes, oxidoreductase activity and innate  
164 immune system. However, proteins with increased abundance during the infection were mainly  
165 mapped to carboxylic acid metabolism, cellular amide metabolism, Cytoplasmic ribosomal  
166 components, cytoplasmic translation and ligase activity (Fig. 2E, Fig. S2, Table S2).

### 167 ***Dynamics of host metabolic pathways and protein-protein interactions during Ah infection***

168 We performed protein-protein interaction (PPI) and pathway analysis for the DEPs and  
169 enriched proteins to see how the *Ah* infection affected the overall composition of the liver



170 proteome. For the downregulated proteins, the enriched pathways and processes include the  
171 processes like lysosome, apoptosis, metabolism of xenobiotics by cytochrome P450, retinol  
172 metabolism, pantothenate metabolism, beta alanine metabolism, drug metabolism, metabolism  
173 of RNA and endocytosis (Fig. 3A-B). Pathway enrichment analysis of the upregulated proteins  
174 revealed the involvement of these proteins in several biological processes and pathways  
175 including innate immune system, signaling of B cell receptor, proteasome pathway, ribosome,  
176 carbon metabolism, protein synthesis (translation) and protein processing in ER (Fig. 3C-D).  
177 Dysregulation of these processes may indicate the severity of infection and its adverse effects  
178 on overall physiological processes.

#### 179 **A. *hydrophila* infection alters anti-oxidative defence system and hepatic xenobiotic** 180 **metabolism**

181 Infections are generally accompanied by a disturbance of the normal cellular homeostasis.  
182 Biotinidase protein (Btd) expression was found to be decreased by 7-folds during *Ah* infection  
183 (Fig. 2D, Table S1). Biotinidase recycles protein-bound biotin, resulting in the regeneration of  
184 free biotin which is essential for carbohydrate, protein and fat metabolism. Biotin deficiency  
185 has been reported to impair normal growth and immune functions (15). Another protein  
186 Antithrombin-III-like isoform X1 (Serpinc1) was also decreased by ~7 folds during *Ah*  
187 infection. Antithrombin is a natural coagulant synthesised in the liver and also involved in the  
188 anti-inflammatory signaling responses (16). Proteins like Glutathione transferase (Gst-  
189 A0A498NKS6), Glutathione peroxidase, Cytochrome P450 family (Cyp1a, Cyp2f2), Epoxide  
190 hydrolase (Ephx1), Dihydropyrimidinase (Dpys) and Dihydropyrimidine dehydrogenase  
191 [NADP (+)] (Dypd), involved in Xenobiotics and Drug metabolism (17) were downregulated  
192 during *Ah* infection. Proteins related to antioxidative system were also downregulated such as  
193 Peroxiredoxin-4 (Prdx4), Gst and Prenylcysteine oxidase 1 (Pcyox1). Downregulated proteins  
194 were also mapped to biological processes involved in general functions of liver such as

195 Monoxygenase (Cyp1a) and Epidermal retinol dehydrogenase 2-like protein (Sdr16C5) from  
196 Retinol metabolism, Dihydropyrimidinase (dpys) and Dihydropyrimidine dehydrogenase  
197 (dpydb) from Pantothenate and CoA biosynthesis and beta-Alanine metabolism, Glycine  
198 hydroxymethyltransferase (Shmt2) which is involved in several biological processes like  
199 carboxylic acid metabolism, amino acid metabolim and energy metabolic processes (Fig. 3A,  
200 Table S2).

### 201 ***A. hydrophila* infection alters the cytoskeleton, lysosomal and apoptotic mechanism**

202 Bacteria manipulate host cytoskeletal proteins for their mobility and distort the normal  
203 cytoskeleton. Few of the host cytoskeletal proteins including Actin-related protein 2 (Actr2),  
204 Alpha N-catenin (Ctnna2), Nucleolin (Ncl) were observed with an increased abundance change  
205 of 3.6-fold, 1.8-fold and 1.8-fold, respectively (Table S1). Under normal conditions, these  
206 proteins maintain the cytoskeletal homeostasis and the protein Actr2 is an ATP-binding  
207 component of the Arp2/3 complex that helps in cell motility by mediating the development of  
208 branching actin networks in the cytoplasm. The functioning of the Arp2/3 complex is required  
209 for vesicle trafficking, lamellipodium protrusion, and pathogen movement inside the host cell  
210 during infections. (18). Important proteins from lysosome pathway (KEGG ID: dre04142)  
211 showed a decreased trend in AH group (*Ah* infected). These include Cathepsin F-like protein  
212 (Ctsf, 3.7-fold decreased), Tripeptidyl-peptidase 1-like protein (Tpp1, 4.2-fold decreased),  
213 Lysosome membrane 2-like protein (Scarb2, 2.6-fold decreased) and Clathrin heavy chain  
214 (Cltca, 2.1-fold decreased). Different subunits of VATPase including Atp6voc, Atp6v1a, Atp8,  
215 Atp2b1 and palmitoyl-protein thioesterase 1 (Ppt1), Ras-related rab-15 (Rab15) and Ras-  
216 related Rab-1A (Rab1a) were also downregulated. Phospholipid scramblase 2-like (Plcsr3)  
217 which is a member of phospholipid scramblases, reported to mediate apoptosis by ATP  
218 independent bidirectional migration of phospholipids (19) has been observed with a 3.6-fold  
219 decreased abundance in *Ah* infected group (Table S1).

220 Another important protein, Glutathione-dependent dehydroascorbate reductase (Chuk)  
221 from apoptosis pathway was also found to be downregulated in AH group by 2.3-fold. Proteins  
222 from the immune system; Toll like receptor 3 (Tlr3) and C-type lectin domain family 4 member  
223 E-like protein (Clec4e/Cd207) and Chuk were found downregulated by 1.6, 1.9 and 2.3-fold,  
224 respectively, during the *Ah* infection. TLRs recognise pathogen-associated molecular patterns  
225 originating from microbes play a crucial function in macrophage maturation and activation and  
226 C-type lectins are also known to enhance adaptive immune responses (20).

### 227 **Proteomic alterations related to immune functions, protein synthesis and Carbon** 228 **metabolism**

229 As expected, we observed significant increase in the host proteins belonging to proteasome  
230 and ubiquitin dependent degradation pathways (KEGG Pathway ID: dre03050) and B cell  
231 receptor (BCR) signalling, (Reactome Pathway ID: DRE-1168372) (Fig 3B). Many biological  
232 activities rely on ubiquitination, including transcriptional regulation, cell cycle progression,  
233 signal transduction, protein transport, immunological responses and pathogenesis. Bacterial  
234 infections may take advantage of the host's ubiquitin system to manipulate the immune  
235 response for their own benefits (21). Proteins like CCT-theta (Cct8), Intelectin 2 (Intl2),  
236 Proliferation-associated 2G4 (Pa2g4a), Galectin (Lgals3) and Unconventional myosin-Ic-like  
237 isoform X1 (Myo1c) which showed increased abundance in the *Ah* infected group, mapped to  
238 Innate immune system. Intelectin (Intl2) is a galectin binding lectin which has shown more  
239 than 6-fold increase during *Ah infection*. Intelectin has been shown to agglutinate bacteria, most  
240 likely due to its carbohydrate-binding ability, implying its role in innate immune system during  
241 the *Ah* infection (22). Also, the upregulated proteins such as subunits of proteasome; Psma8,  
242 Psma5, Psm3, Psm6, involved in downstream signaling events in BCR might be an  
243 indication of immune response during infection. Further, a panel of upregulated proteins  
244 mapped to ribosomal complex (viz. Rpl7a, Rps6, Rpl2, Rpl13), aminoacyl-tRNA biosynthesis

245 (viz. Qars, Eprs, Aars), and protein processing in endoplasmic reticulum (viz. Hsp90aa1,  
246 Rrbp1, Hspa8, Sec31a, Mogs). The increase in protein synthesis machinery during infections  
247 could be a modulated host response to maintain protein homeostasis and to promote host cell  
248 immune response against pathogen (23).

249 Proteins of carbon metabolism like 6-Phosphofructo-2-kinase (Pfk2), 2-Phospho-D-  
250 glycerate hydro-lyase (Eno1a), Citrate synthase (Cs), Succinyl-ligase (Suclg2), Acetyl-  
251 coenzyme A synthetase (Acss2) and oxidative phosphorylation (OXPHOS) as ATP synthase-  
252 coupling factor 6 (Atp5j), Inorganic diphosphatase (Ppa2), Complex -I proteins (Ndufa2,  
253 Ndufb10) were found to be increased during *Ah* infection in this study. Few proteins from  
254 OXPHOS including ATP synthase protein 8 (Atp8) and NADH Dehydrogenase (Ndufa6,  
255 Ndufb6, Ndufa12) were found to be control enriched and were not quantified in infected group.  
256 Also, proteins from fatty acid metabolism and peroxisome proliferator-activated receptors  
257 (PPAR) signaling pathways (viz. Fabp, Scp2, Cpt1) were upregulated in the *Ah* infected group.  
258 Alterations in Scp2 expression have been linked to several other liver functions such as bile  
259 acid metabolism, biliary lipid secretion, hepatic cholesterol storage and synthesis (24). PPAR  
260 signaling plays active role in regulating inflammatory responses in innate and adaptive  
261 immunity. The anti-inflammatory and antibacterial characteristics of PPAR activation may  
262 benefit the host during bacterial infections (25). Mineral and oxidant homeostasis was also  
263 altered during the *Ah* infection as a few related proteins such as Metalloreductase Steap4  
264 (Steap4) and Glutamine gamma-glutamyltransferase (gGT) were upregulated in the *Ah* infected  
265 group. Stress response proteins including Heat shock HSP 90-alpha (Hsp90aa1) and Heat shock  
266 cognate 71 kDa (Hspa8) were also upregulated during the infection.

267 ***Targeted proteomic validation of dysregulated proteins using Selected Reaction Monitoring***  
268 ***approach***

269 The targeted proteomics data using SRM approach, was acquired for 27 differentially  
270 expressed proteins selected based on the discovery proteomics data (DDA followed by LFQ)  
271 (details in Methods section). The analysis ended up with a list of 328 transitions and 33  
272 peptides belonging to sixteen proteins (plus 18 transitions for spiked in peptide) (Table S3).  
273 Nine proteins had at least two significant peptides. Group comparison analysis was performed  
274 in Skyline between 5 AH and 6 control samples which showed that the overall trend for these  
275 proteins is similar to that of DDA data in terms of increased or decreased abundance in *Ah*  
276 infected samples (AH condition) (AH condition) (Table S3). Among these, four proteins had  
277 three or more significant peptides passing the cut-off p value of 0.05 and fold change criterion  
278 of 1.5. These included three downregulated proteins viz. Bdh1 (D-beta-hydroxybutyrate  
279 mitochondrial), Chuk (D- Glutathione-dependent dehydroascorbate reductase) and Ugp2  
280 (UTP-glucose-1-phosphate uridylyltransferase) (Fig. 4A-C) and one upregulated protein Atp5j  
281 (ATP synthase-coupling factor 6) (Fig. 4D). Individual sample wise peak area intensities for  
282 all the peptides of these proteins is represented in supplementary data (Fig. S3A-D, Table S3).  
283 Bdh1 is an important enzyme involved in lipid catabolism, Chuk protein has been reported for  
284 its role in apoptosis and Ugp2 is a carbon metabolic enzyme. Among the upregulated protein,  
285 the protein abundance changes were validated for Atp5j which is an important protein of  
286 oxidative phosphorylation. Additionally, five other proteins were found to be significant with  
287 2 peptides only. These included three downregulated proteins namely, Dpys, Tpp1 and  
288 Sdr16c5, and two upregulated proteins ribosomal protein Rpl7a and Steap4 protein (Fig. S4).

289

290

291

292

293

## 294 **DISCUSSION**

295 Bacterial diseases are the most prominent cause of mass mortality in freshwater aquaculture  
296 system. Among the bacterial diseases, the disease caused by *Aeromonas* group has great  
297 significance. Proteomic analysis of liver tissue of *Aeromonas hydrophila* (*Ah*) infected *L.*  
298 *rohita* was performed to explore the perturbed proteins and pathways in *Ah* pathogenesis. This  
299 is the first comprehensive proteomic analysis carried out for liver tissue of *Ah* infected *L.*  
300 *rohita*. Pathway enrichment analysis of the upregulated and downregulated proteins revealed  
301 the involvement of these proteins in several biological processes that could provide insights for  
302 the pathogenesis of *Ah* infection. Our results summarised the key proteins and pathways  
303 involved in metabolic reprogramming of host cells during *Ah* infection. Pathways like  
304 lysosome pathway, apoptosis, metabolism of xenobiotics by cytochrome P450, retinol  
305 metabolism, pantothenate metabolism, beta alanine metabolism and drug metabolism were  
306 found to be majorly mapped by downregulated proteins. However, innate immune system,  
307 signaling of B cell receptor, proteasome pathway, ribosome, carbon metabolism and protein  
308 processing in ER were mainly mapped to upregulated proteins.

309 Our results showed a decrease in Biotinidase enzyme in liver tissue during *Ah* infection.  
310 Biotinidase is an important enzyme responsible for regeneration of biotin. In the head kidney,  
311 spleen, and skin of grass carp (*Ctenopharyngodon idella*), biotin deficiency lowered the mRNA  
312 levels of anti-microbial compounds (hepcidin, mucin and defensin), increased the levels of pro-  
313 inflammatory cytokines as interferon  $\gamma$ 2 (IFN- $\gamma$ 2), interleukin 6 (IL-6), IL-1, IL-8 and tumour  
314 necrosis factor  $\alpha$  (TNF- $\alpha$ ) (15). During *Ah* infection, Antithrombin showed a decrease in *Ah*  
315 infected group compared to the control group. Besides its function in coagulation, antithrombin  
316 has been reported to exhibit anti-inflammatory responses against many gram negative and  
317 positive bacteria as it showed affinity to bind with lipopolysaccharide (LPS) on bacterial  
318 surfaces (16).

319 We observed that *Ah* infection affects the antioxidative and xenobiotic potential of the  
320 host. Liver is recognised as the primary site of detoxification and xenobiotic metabolism.  
321 Decreased protein abundance of several proteins was observed including few CYP proteins  
322 (Cyp1a, Cyp2f2, Cyp2g1, Cyp3a) related to xenobiotic metabolism and antioxidation, during  
323 *Ah* infection. Dysregulation of CYP genes was observed in channel catfish liver, gills and  
324 intestine after infection with *Edwardsiella ictaluri* where transcripts of several members of  
325 Cyp2 were downregulated as in our case (26). Monooxygenase Cyp1a protein which is  
326 downregulated in our study, showed an increase at transcriptomic level in the kidney, gill, testis  
327 and liver of Nile Tilapia after *Ah* infection (27). Proteins related to oxidative mechanism were  
328 decreased in AH group including Peroxidoxin 4 (Prdx4), Glutathione transferase, Glutathione  
329 peroxidase and Prenylcysteine oxidase 1. Our results for Prdx4 match with the report for human  
330 cell line samples where a proteome level decrease was observed in Prdx4 along with Prdx2 and  
331 Prdx6 after Lymphocytic Choriomeningitis Virus infection (28). We found a significant  
332 increase in the abundance of Steap4, a metalloredutase enzyme involved in iron and copper  
333 homeostasis. It is reported to play important role in cell responses to inflammatory and  
334 oxidative stresses and its expression can be modulated by hypoxia and cytokines such as IL-1  
335 beta and TNF-alpha (29). Our results for Steap4 are similar to those reported in spleen of  
336 rainbow trout in response to *Yersinia ruckeri* infection (30). Such observations indicated an  
337 overall effect of *Ah* infection on general body functions and growth of fish through oxidative  
338 stress or dysregulation of its antioxidant capacity.

339 Our results suggest that *Ah* infection tends to affect the process of phagolysosomal  
340 killing by downregulating several proteins involved in the process. Proteins like Cathepsins,  
341 Tpp1, Ppt1 are cysteine and serine proteases or hydrolases that may play role in pathogen  
342 killing (31, 32). Vatpase enzymes are important for maintaining the acidic pH inside the  
343 lysosomes whereas the other proteins (as Rab proteins) are important for cargo transportation

344 inside the cell (33). Another protein, Phospholipid scramblase 2-like (Plcsr3) was observed  
345 decreased during *Ah* infection. Plcsr3 has been reported to assist in the recognition of apoptotic  
346 cells by macrophages (19). Alterations in these proteins could be the outcome of the pathogenic  
347 processes that favor intracellular survival of the pathogen in the host cells (Fig. 5A).

348 Further we propose that *Ah* infection may promote the survival of infected cell by  
349 escaping apoptosis or antimicrobial events by interfering with Tlr3 signaling. Immune related  
350 protein, Tlr3 was found to be downregulated and another protein involved in the downstream  
351 signaling; Dual specificity mitogen-activated kinase kinase 2-like protein (Map2k2b- MEK1/2)  
352 was not detected in the infected group (Fig. 5B). TLRs, which recognise pathogen-associated  
353 molecular patterns (PAMPs) arising from microorganisms, are one of the most important  
354 components of innate or non-specific immunity (20). TLRs can stimulate the TIR-domain-  
355 containing adapter-inducing interferon-dependent signaling pathway (TRIF) mediated  
356 signaling through Tumor necrosis factor receptor-associated factor (TRAF) that finally  
357 activates MAP kinase (MEK1/2), NF- $\kappa$ B or Activator protein (AP) (34). Tlr3 has generally  
358 been recognised as endosomal receptor, whereas in *Labeo rohita* and *Cyprinus carpio*, it has  
359 been reported as a cell surface receptor capable of TRIF mediated signaling (35). Tlr3, was the  
360 first identified antiviral TLR member that has been reported to detect dsRNA of many RNA  
361 viruses and activate the TIRF pathway, which produces type I interferon (IFN) and pro-  
362 inflammatory cytokines (36). However, Tlr3 has also been observed to respond to bacterial  
363 infection in zebrafish, channel catfish, yellow croaker and mice and to respond to Tlr2  
364 microbial ligand peptidoglycan in immature dendritic cells (36). An increased level of Tlr3 at  
365 transcriptomic level have been reported in Zebrafish in response to the infection with  
366 *Edwardsiella tarda* (37). Our results are similar to those observed in kidney and spleen of blue  
367 catfish (38) and kidney of rainbow trout (39) where Tlr3 expression was decreased after  
368 infection with gram negative bacteria *E. ictulari* and *Yersinia ruckeri*, respectively. Also, Tlr3



369 downregulation has been related to immunosuppression in case of severe fever caused by Dabie  
370 bandavirus (40). Tlr3 downregulation has been reported as a way to avoid apoptosis during  
371 liver cancer (41, 42).

372 We observed a decreased abundance of Clec4e (Cd207) and Calcineurin in the *Ah*  
373 infected group (Fig. 5B). Clec4e protein is a calcium-dependent lectin that acts as a pattern  
374 recognition receptor (PRR) of the innate immune system and has been reported to be important  
375 for autophagy and antimicrobial responses. Such C-type lectin receptor (CLRs) are known to  
376 identify PAMPs and damage associated molecular patterns (DAMPs) and to activate NF- $\kappa$ B  
377 signaling for the generation of cytokines and chemokines through the immune-receptor  
378 tyrosine-based activation motif (ITAM) and SYK tyrosine kinase pathway (43). Clec4e has  
379 been shown to cause signaling through Phospholipase C gamma 2 (PLC $\gamma$ 2) to activate the  
380 calcineurin/NFAT pathway (43). Activated Calcineurin stimulates NFAT and NF- $\kappa$ B signaling  
381 in T cells, regulates cell growth functions and apoptosis. The NFAT pathway is also involved  
382 in the generation of antibodies and the differentiation of B cells (44). Decreased abundance of  
383 Clec4e and Calcineurin indicates that *Ah* pathogenesis might involve Clec4e mediated  
384 signaling to avoid antimicrobial effects and autophagy of the infected host cell. A combination  
385 of Clec4e and Tlr4 agonists has been reported to inhibit the growth of *Mycobacterium*  
386 *tuberculosis* in the lungs of *Mtb*-infected guinea pigs and mice (20). Similar  
387 immunotherapeutic approach using Tlr3 can be designed for controlling *Ah* infection.

388 A few dysregulated proteins belong to Proteasome which is a protease complex  
389 involved in hydrolysis of selected proteins in an ATP dependent manner. The proteasome  
390 complex has been shown to regulate LPS-induced signal transduction, suggesting that it could  
391 be a promising therapeutic target in Gram-negative bacteria. Alpha and beta subunits (Psm1  
392 and Psm4) of the 20S proteasome complex have been identified as LPS-binding proteins in  
393 *Aeromonas salmonicida* infected rainbow trout (45). Further, mapping of upregulated proteins

394 to ribosomal subunits, ribosome biogenesis, amino acyl- tRNA complex and protein processing  
395 in ER reveals an increased level of protein synthesis during *Ah* infection. Such biological  
396 processes are essential for maintaining homeostasis and promoting host cell immune response  
397 against pathogen during infections. Protein synthesis is also necessary for the survival of  
398 bacteria inside the host, as reported in case of *Rhodopseudomonas palustris* infection (23).

399 Further we observed metabolic reprogramming of the host cells as a result of *Ah*  
400 infection (Fig. 5C). Proteins related to energy metabolic processes including glycolysis, Kreb's  
401 cycle, and oxidative phosphorylation have showed changes in response to *Ah* infection. Such a  
402 reprogramming is more likely an adaptation to fulfil the high energetic and biosynthetic  
403 demands in the infected host cell. Among the metabolic enzymes that were altered with *Ah*  
404 infection, enzyme 6-Phosphofructo-2-kinase (Pfk2) showed an increased abundance. This  
405 enzyme has been reported to play important role in maintaining glycolysis by allosterically  
406 regulating the Phosphofructokinase 1 (Pfk1), a rate limiting enzyme of glycolysis (46). Another  
407 glycolytic enzyme, Enolase (Eno1) is also upregulated in the AH group. Eno1 converts  
408 phosphoglycerate to phosphoenolpyruvate that finally gives pyruvate. Another enzyme  
409 involved in carbon metabolism (47); UTP--glucose-1-phosphate uridylyltransferase (Ugp2)  
410 was also decreased by 1.7 folds which might be an indication of decreased glycogenesis in  
411 support of glycolysis. Ugp2 is also reported to trigger immune responses through P2Y signaling  
412 pathway (48). Upregulation of glycolytic enzymes could be a remodelling of the *Ah* infected  
413 cell for cell proliferation, similar to what has been shown in cancer cells that rely on high rate  
414 of glycolysis (49). Similar findings of glycolytic increase have been reported for mammalian  
415 macrophages infected with *Mycobacterium tuberculosis* (*Mtb*) (50). Increase in the glycolytic  
416 enzymes has been observed in kidney derived M1 macrophages of Carp upon activation with  
417 bacterial LPS from *Escherichia coli* (51). M1 macrophages undergo metabolic reprogramming  
418 from OXPHOS to glycolysis after activation with bacterial LPS alone or in conjunction with

419 IFN- $\gamma$  (51). In *Mtb* infections, glycolytic reprogramming of M1 macrophages has been  
420 associated with two breaks in the tricarboxylic acid cycle (TCA cycle) and suppression of part  
421 of the electron transport chain (ETC) in the mitochondria. Breaks in TCA cycle includes the  
422 downregulation of two important enzymes i.e., Succinate dehydrogenase (SDH) and isocitrate  
423 dehydrogenase (IDH) that favours the build-up of Citrate and Succinate (52, 53).

424         These reported findings are complementary with our results as we could find higher  
425 expression of Acetyl-coenzyme A synthetase (Acss2), Citrate synthase (Cs) and Succinyl  
426 ligase (Suc1g2) and a downregulation of Isocitrate dehydrogenase (IDH) which has shown  
427 enriched expression in the control group. Enzyme Cs catalyses the first reaction of TCA cycle  
428 where Oxaloacetate combines with Acetyl-CoA (involving Acss2) to form Citrate (Fig. 5C).  
429 The enzyme Succinyl ligase also known as Succinate synthase converts succinyl-CoA to  
430 Succinate and free coenzyme A. The downstream metabolite of Citrate (Itaconate) inhibits  
431 Succinate dehydrogenase (SDH) activity that again leads to an increase in Succinate (52). Both  
432 Citrate and Succinate have been reported to be involved in pro-inflammatory immune functions  
433 in macrophages. Citrate can accumulate in the cytosol to play important role in the production  
434 of mitochondrial reactive oxygen species (mROS), Nitric oxide (NO) and fatty acid synthesis.  
435 mROS can pose antimicrobial effects and activate interleukin 1  $\beta$  (IL-1 $\beta$ ) (54). Intracellular  
436 lipid metabolism promotes lipid droplet formation that are stored as energy resource for the  
437 cell required for inflammation, cell signaling and homeostasis. They can be utilised by the  
438 bacteria as well for promoting infection (55). In the later stages of infection, fatty acid  
439 metabolism may stimulate the peroxisome proliferator-activated receptor gamma (PPAR $\gamma$ )  
440 signaling which is known for its anti-inflammatory effects through inhibition of  
441 proinflammatory cytokines such as IL-1  $\beta$  and TNF- $\alpha$  (56). Interestingly, we observed an  
442 increased expression of 15-oxoprostaglandin 13-reductase (Ptgr2) during *Ah* infection.  
443 Overexpression of Ptgr2 in the cells has been reported to decrease the PPAR $\gamma$  dependent

444 transcription (57). Moreover, Ptgr2 knockdown in LPS stimulated macrophages, resulted in  
445 decreased production of pro-inflammatory cytokines (58). Such observations paved a way  
446 towards exploring Ptgr2 mediated anti-inflammatory therapy for *Ah* infection. mROS can pose  
447 antimicrobial effects and activate interleukin 1  $\beta$  (IL-1 $\beta$ ) (54).

448 Succinate accumulation also leads to the generation mROS and NO and can stabilise  
449 hypoxia-inducible factor 1-alpha (HIF-1 $\alpha$ ). Activated HIF-1 $\alpha$  further promotes the glycolytic  
450 pathway and lactate production and causes inflammation by positively regulating the glycolytic  
451 genes and IL-1 $\beta$  expression (52, 59). In our study, Lactate dehydrogenase enzyme (*Ldha*) has  
452 been found to show enriched expression in the *Ah* infected group (AH group). During this  
453 reprogramming, mitochondrial electron transport chain (ETC) is highly disturbed (52). In our  
454 study, we observed dysregulation of many proteins involved in ETC and OXPHOS.  
455 Dysregulated proteins include NADH dehydrogenase (*Ndufa*, *Ndufb*, *Ndufv2*, *Ndufs8*), ATP  
456 synthase-coupling factor 6 (ATP5J), ATP synthase protein 8 (ATP8), Mt-co1(Cytochrome c  
457 oxidase subunit 1), and Inorganic diphosphatase (*Ppa2*) (Fig. 5C). Such a reprogramming has  
458 been profoundly observed in LPS activated dendritic cells and macrophages, activated effector  
459 T cells, activated natural killer cells and activated B cells (60). Remodelling of these metabolic  
460 processes enables the cells to produce sufficient ATP for performing cellular functions which  
461 may be inflammatory cytokine production, phagocytosis or antigen presentation (60). Based  
462 on these findings and our observations, we hypothesise that *Ah* pathogenesis in *Labeo rohita*  
463 involves metabolic reprogramming that supports several inflammatory immune functions  
464 which is a hallmark for most immune cells.

465

466

467

468 **CONCLUSIONS**

469 We analysed the proteome level dynamics in liver tissue of *L. rohita* as a result of *Ah* infection.  
470 Our proteomics analysis provided new insights into the proteins involved and processes  
471 underlying *Ah* pathogenesis in *L. rohita*. We observed that during *Ah* infection, several host  
472 proteins and metabolic pathways were altered affecting important biological processes like  
473 antioxidative potential, lysosomal killing and apoptosis. We also observed remodelling of  
474 important energy related processes such as glycolysis and Krebs cycle which might be useful  
475 in modulating inflammatory response during *Ah* infection in *L. rohita*. Our findings have  
476 cleared the way for more research into the involvement of Toll-like receptors (Tlr3), C-type  
477 lectins (Clec4e), and metabolic enzymes in *Ah* pathogenesis. Collectively, our data provided  
478 new mechanistic insights into *Ah* infection that can help in characterisation of host-pathogen  
479 interactions and aid in the selection and prioritisation of proteins to be used in host directed  
480 immunotherapy against *Ah* infection.

481

482

483

484

485

486

487

488

489

## 490 **MATERIALS AND METHODS**

### 491 **Overall experimental design**

492 This study aimed at proteomic profiling of liver tissue of *Ah* infected *Labeo rohita*. Fishes were  
493 challenged with *Ah* and sampled such that there was a total of 12 samples including six each  
494 for Control and AH group (*Ah* infected). Following sample collection, discovery based  
495 proteomic analysis was performed by taking four samples for each group (four each of Control  
496 and AH group). The data was analyzed using MaxQuant software followed by statistical  
497 analysis in Metaboanalyst tool to identify the differentially expressed proteins (DEPs) in liver  
498 tissue. Gene ontology (GO) analysis was performed to obtain an overview of functional  
499 annotation of significant proteins and dysregulated metabolic pathways. The protein abundance  
500 changes for a panel of differentially expressed proteins was validated using SRM approach  
501 where eleven samples (6 Control and 5 AH) were analyzed. Further, detailed analysis was done  
502 to understand the molecular mechanism of *Ah* infection.

### 503 **Bacterial collection and identification**

504 In the study, *Aeromonas hydrophila* strain was isolated from the kidney tissue of naturally co-  
505 infected *Labeo rohita* (NCBI Accession no. MT374248). Briefly, kidney tissue was streaked  
506 onto tryptic soy agar (TSA, Himedia) and incubated at 28 °C for 24 hours. Representative  
507 colonies were isolated and re-streaked on fresh TSA medium until purity was attained. Pure  
508 cultures of the isolated bacteria were subjected to morphological analysis, and the taxonomy  
509 of the isolates was determined following the 16S rRNA gene using the gene sequence universal  
510 primers; forward primer 27F 5'-AGAGTTTGATCCTGGCTCAG-3' and reverse primer  
511 1492R 5'-GGTACCTTGTTACGACTT-3' (Chromous Biotech Ltd., Bengaluru, India) (61)  
512 (Fig. 1A). The strain was stored at -70 °C in 30% glycerol stock until use for the challenge  
513 study.

514 To detect the virulence of strain, *Ah* (MT374248) was cultured in Brain Heart Infusion broth  
515 (BHI) (Himedia) at 28 °C and kept in incubator at 150 rpm for 18 hours. For confirmation of  
516 *Ah*, a loop of bacteria was streaked onto Aeromonas Isolation Medium HiVeg™ Base  
517 (Himedia) and polymerase chain reaction (PCR) was conducted using target segments of  
518 primers; forward: 16S rDNA1 451–473 5'-GAAAGGTTGATGCCTAATACGTA-3' and  
519 reverse: 16S DNA2 1115–1135 5'-CGTGCTGGCAACAAAGGACAG-3' with an expected  
520 product length of 685 bp (62). The amplifications were performed in thermal cycler (Bio-Rad,  
521 USA) in which 30 PCR cycles were run under the following conditions; denaturation at 94 °C  
522 for 2 min, primer annealing at 56 °C for 2 min, and DNA extension at 72 °C for 2 min in each  
523 cycle. A negative control with all the reaction components except template DNA and a positive  
524 control (extracted genomic DNA, from *Ah* MTCC culture, 1739T- Chandigarh, India) were  
525 considered. Ten microliters of PCR products were electrophoresed in a 1% agarose gel  
526 containing ethidium bromide at 100 V for 1 hour, visualized on an ultraviolet (UV)  
527 transilluminator (Bio-Rad) (Fig. S5).

### 528 **Collection of fish and maintenance for the experiment**

529 For expression study, six-month-old fish (N=150, average weight 70±10 g) were collected from  
530 a local fish farm (Pen Raigad District, Maharashtra) and brought to wet lab facility (ICAR-  
531 CIFE, Mumbai). Fishes were equally distributed and acclimated in three circular fibre tanks  
532 and fed 2 % body weight. Fishes were maintained at a temperature of 26-28 °C with proper  
533 aeration, and removal of faeces on daily basis. All the fishes were observed for external clinical  
534 signs and randomly few fishes from three tanks sacrificed to observe pathogen in the fish using  
535 PCR.

### 536 ***Aeromonas hydrophila* challenge and sampling**

537 For challenge test, LD50 dose was determined as per the protocol described by  
538 Siriyappagouder et al. (63) and found to be  $1.5 \times 10^8$  CFU for the isolated strain. The bacteria

539 were cultured till 18 hours, and LD50 dose of  $1.5 \times 10^8$  CFU suspension was prepared after  
540 washing with PBS. The fish were pooled and acclimatized, starved for 2 days and then  
541 approximately  $1.5 \times 10^8$  bacterial cells in PBS or the same volume of PBS solution (Control)  
542 were intraperitoneally inoculated into 36 fish (18 each for control and challenged). The  
543 challenged and control groups were separately maintained in six crates (6 fish each) of a 100-  
544 liter capacity high density polyethylene plastic crate at 26-28 °C. The presence of external signs  
545 of hemorrhage were observed in the challenged fish groups post-infection. Expectedly, these  
546 signs were not detected in the control group (Fig. S6). After 48 hours, fish were euthanized and  
547 liver samples were collected. Collected samples were stored at -80 C till further use. For  
548 proteomic analysis, tissue from three fishes were pooled into one resulting in a total of six  
549 samples each for control and challenged group labelled as Liv-C1 to C6 and Liv-AH1 to AH6,  
550 respectively.

#### 551 **Tissue lysis and protein extraction**

552 Tissue lysates were prepared using SDS containing lysis buffer (5% SDS, 100mM Tris/HCl  
553 pH 8.5 (adjusted with phosphoric acid). The tissue was weighed (40-50 mg) and rinsed in a 1X  
554 phosphate buffered saline (PBS) solution (2-3 times to remove any blood). After washing the  
555 tissue, 250  $\mu$ l of lysis buffer was added to the tissue along with 5  $\mu$ l of Protease inhibitor  
556 cocktail (50X stock, Sigma- Catalogue no. 11873580001) and incubated on ice for 30 min.  
557 Sonication was performed for 2 min with an amplitude of 40% with 5 sec pulse on and 5 sec  
558 off. Centrifugation was done to remove the debris and clear supernatant was collected.

#### 559 **Protein quantification and digestion**

560 Tissue lysates were processed for quantification of proteins using the BCA assay (Thermo,  
561 Ref. 23227) with Bovine serum albumin as the standard protein. After quantification, 30  $\mu$ g  
562 protein was taken for digestion using filter assisted sample preparation (FASP) based digestion  
563 method. In brief, the protein was first reduced using TCEP solution with a final concentration



564 of 20 mM. Initial volume at this step was kept as 30  $\mu$ l (volume made up using 1X lysis buffer).  
565 Reduced sample was loaded onto a 30 KDa filter (Catalogue no. MRCF0R030- Merck  
566 Millipore) to proceed for FASP based digestion. Following the required steps of alkylation and  
567 washing, trypsin mixed in digestion buffer (50 mM Ammonium Bicarbonate) was added in  
568 1:30 ratio for enzyme to protein. Samples were incubated in a wet chamber at 37°C for 16  
569 hours. Digested peptides were eluted in a fresh collection tube, dried and stored until further  
570 processing. Before mass spectrometry, samples were cleaned using C18 stage tips (Empore™  
571 SPE Disks matrix active group C18, diam. 47 mm, catalogue no. 66883-U- Merck).

### 572 **Liquid chromatography tandem mass spectrometry in data dependent acquisition mode**

573 For all the samples, peptides were quantified using Scopes method (64). After quantification,  
574 one  $\mu$ g of peptide sample was loaded on the column and LC-MS/MS was performed. All  
575 samples (4 for each Control and AH group) were run with an LC gradient of 120 min. Data  
576 was acquired using an Orbitrap-Fusion Tribrid mass-spectrometer connected to an Easy-nLC  
577 nano-flow liquid chromatography 1200 system. Peptide sample was loaded onto the pre-  
578 analytical column (100  $\mu$ m x 2 cm, nanoViper C18, 5  $\mu$ m, 100A; Thermo Fisher Scientific) at  
579 a flow rate of 5  $\mu$ l/min. Peptides were resolved on analytical column (75  $\mu$ m x 50 cm, 3  $\mu$ m  
580 particle, and 100 Å pore size; Thermo Fisher Scientific) at a flow rate of 300 nl/min over 120  
581 min gradient in solvent B (80% Acetonitrile with 0.1% Formic acid (FA). The Orbitrap mass  
582 analyzer was used to perform mass spectrometric acquisition in data dependent acquisition  
583 (DDA) mode in the full scan range of 375-1700 m/z with a mass resolution of 60,000. With a  
584 dynamic exclusion time of 40 seconds, the mass window was set at 10 ppm. All MS/MS spectra  
585 were obtained using the HCD method (High Energy Collision Dissociation) for fragmentation  
586 at MS1 and MS2 level, the AGC target was set at 400000 and 10000, respectively. A lock mass  
587 of 445.12003 m/z was used for positive internal calibration.

### 588 **Protein identification and quantification using label-free quantification approach**

589 The raw mass spectrometry data was analysed using MaxQuant (v1.6.6.0) software against  
590 UniProt protein database for *Labeo rohita* (ProteomeID- UP000290572, Taxonomy ID- 84645,  
591 downloaded on 18.06.2021) using the in-built search engine, Andromeda. All the raw files  
592 were analyzed together using Label-Free-Quantification (LFQ) parameters. Label type was set  
593 to standard with a multiplicity of 1, and the match between run option was checked. Orbitrap  
594 fusion mode was selected as instrument, and trypsin as a protease was chosen. A total of two  
595 missed cleavages were permitted. Carbamidomethylation at Cysteine (+57.021464 Da) was  
596 chosen for fixed modification, and oxidation at Methionine (+15.994915 Da) was chosen for  
597 variable modification. A false discovery rate of 1% was specified for both proteins and  
598 peptides. Reverse was chosen as the decoy mode option, and proteins were recognised solely  
599 by their unique peptide. The LFQ intensities obtained for each sample were considered for  
600 quantitative analysis (Table S1).

#### 601 **Statistical analysis using MetaboAnalyst**

602 Statistical analysis was performed taking MaxQuant analyzed files in Metaboanalyst software  
603 (65). One of the samples (Liv-AH1) was discarded due to poor mass spectrometry results (Fig.  
604 S1A) The proteomic data of the remaining seven samples was considered for further analysis  
605 including four Control samples; Liv-C1, 2, 3, 4 and three *Ah* infected samples (AH group)  
606 labelled as Liv-AH2, 3, 4. The K-Nearest Neighbor (KNN) algorithm was used to impute the  
607 missing values of proteins with abundance values in more than 75% of each group, which were  
608 then used in differential protein expression analysis. The data was  $\log_{10}$  transformed before  
609 further statistical analysis. The significant differentially expressed proteins were identified  
610 using a two-sample t-test (Welch t-test) with a p-value threshold of 0.05. Proteins with  
611 minimum fold change value of 1.5 were regarded as significant differentially expressed  
612 proteins (DEPs) among all t-test passed proteins. Variable importance in projection (VIP) score  
613 was obtained through Partial Least Squares Discriminant Analysis (PLS-DA) which is a

614 supervised method. As a weighted sum of squares of the PLS weight, VIP indicates the  
615 importance of the variable to the whole model. Heatmap representing the expression of top  
616 DEPs was also obtained from Metaboanalyst analysis. Volcano plots were plotted using online  
617 tool VolcanoseR (66).

### 618 **Gene ontology, Pathway and protein-protein interaction enrichment analysis**

619 Selected dysregulated proteins obtained from LFQ data were taken forward for functional  
620 annotation and biological pathway analysis. Gene names of dysregulated proteins were  
621 retrieved from EggNOG resource (67) on the basis of ortholog annotation and from literature  
622 (as the gene names for *L. rohita* are not updated yet in the available databases). The protein-  
623 protein interaction (PPI) enrichment analysis and visualization of their involvement in  
624 respective biological pathways (KEGG and Reactome) was performed using STRING tool  
625 version 11.5 (68) taking genes of significantly upregulated and downregulated proteins as input  
626 (Table S2). *Danio rerio* was selected as reference organism as these databases are not yet  
627 updated for *Labeo rohita*. Furthermore, biological functional pathway enrichment of different  
628 Gene Ontologies (GO), KEGG, Reactome and Panther Pathway and PPI were done using  
629 Metascape tool (69). In Metascape, custom analysis of DEPs, control and disease enriched  
630 proteins were performed selecting *Danio rerio* as reference organism, considering all of the  
631 terms and categories for annotation and membership (Table S2). Minimum overlap of 3, p-  
632 value cut off of 0.05, minimum enrichment 1.5 were taken as parameters for pathway and  
633 process enrichment and physical core database was selected for protein-protein interaction  
634 enrichment analysis.

### 635 **Targeted proteomic validation of dysregulated proteins using SRM approach**

636 For acquiring the targeted proteomic data using selected/ multiple reaction monitoring  
637 (SRM/MRM) approach, TSQ Altis mass spectrometer (ThermoFisher Scientific, USA)  
638 coupled to an HPLC-Dionex Ultimate 3000 system (ThermoFisher Scientific, USA) was used.

639 In order to separate the peptides, a Hypersil Gold C18 column (1.9  $\mu\text{m}$ , 100 x 2.1 mm,  
640 ThermoFisher Scientific, USA) was used. The flow rate was maintained as 0.45 ml/min for 10  
641 min. Solutions of 0.1% FA and 80% ACN in 0.1% FA were taken as buffer A and B,  
642 respectively in the binary buffer system. The gradient used for chromatographic separation of  
643 the peptides was as follows; 2-45% buffer B for first 6 min, 45-95% buffer B for 0.5 min, 95%  
644 buffer B for 0.5 min, 95%-2% buffer B for 0.5 min, and 2% buffer B for 2.5 min.

645 We started with a list of 30 proteins (16 upregulated and 17 downregulated)  
646 corresponding to 244 peptides and ~4000 transitions. The Skyline software, version 20.1.1.196  
647 (70) was used to prepare the transition lists to be fed into the system. The criteria included for  
648 miss cleavage was 0, for precursor charges +2, +3, and product charge was +1 with 'y' ion  
649 transitions (from ion 2 to last ion -1). A background proteome consisting of UniProt protein  
650 database for *Labeo rohita* (ProteomeID- UP000290572, Taxonomy ID- 84645, downloaded on  
651 18.06.2021) was used. Unique peptides previously identified in the discovery data were only  
652 selected for the targeted experiment. The collision energy values used in the experiment were  
653 as determined by Skyline software. One  $\mu\text{g}$  of peptides from each sample were injected and  
654 run against the target list. Initial optimization was done using pooled peptide samples which  
655 were run against nine transition lists each with 400-450 transitions per method. Consequently,  
656 the list was refined based on consistency of the spectral data. Before injecting to mass  
657 spectrometer, all the samples were spiked in with equal amount or heavy labelled synthetic  
658 peptide DIFTGLIGPMK (C-terminus lysine labelled). Synthetic peptide was added to monitor  
659 the consistency of the mass spectrometric run, for which 18 transitions were added to the final  
660 transition list. For the final SRM run, the data was acquired for all the samples (five AH and  
661 six Control) using two transition lists (two SRM methods) consisting of 617 transitions and 91  
662 peptides corresponding to 27 proteins resulting in 22 raw files (Table S3).

663 **Targeted proteomics data analysis**

664 After data acquisition, all the downstream data analysis was performed in Skyline software  
665 (70). MSMS (.msms) file obtained from the Maxquant analysis was utilised for preparing the  
666 DDA spectral library for analysing S/MRM data. The result files (.raw) were imported to the  
667 Skyline software and assigned to respective conditions as Control and AH. Each peptide was  
668 manually annotated based on peak shape and retention time alignment with other replicates of  
669 the same peptide and library match (dot product measurement). The peptides that didn't adhere  
670 well to the retention time alignment were deleted after manual annotation to refine the data.  
671 Statistical analysis was performed using MSstats external tool inbuilt in Skyline in which  
672 certain peptides were found after the fold change analysis (cut off 1.5) with significant p-value  
673 (0.05). Result reports for all the peptides containing their peak area values were exported in  
674 .csv format to carry out the further analysis (Table S3). Further data analysis was done for  
675 proteins with two or more significant peptides and violin plots for peptide wise intensities  
676 (Table S3) were created using an online tool BoxPlotR (71).

677

678

679

680

681

682

683

684

685

686

687

688

## 689 **DATA AVAILABILITY**

690 The protein database (.FASTA) and raw mass spectrometry data (.raw) have been deposited to  
691 the ProteomeXchange Consortium via the PRIDE partner repository. All result output files for  
692 protein identification are also submitted in text (.text) format along with the parameter file.  
693 Also, the spectral library (.bib) generated using the discovery data for analysing the targeted  
694 data is uploaded. The identifier PXD029421 can be used to retrieve all of the data. (Reviewer  
695 account details: Username: [reviewer\\_pxd029421@ebi.ac.uk](mailto:reviewer_pxd029421@ebi.ac.uk), Password: II191yU0).

696 The transition lists, skyline documents, and all SRM raw (.raw) data for the Selected reaction  
697 monitoring (SRM) experiment have been submitted to Panorama public that can be accessed  
698 through the given link <https://panoramaweb.org/rohuliverproteomicsah.url>  
699 (Reviewer account details: panorama+reviewer75@proteinms.net Password: OKRYbqkf).

700

## 701 **AUTHOR'S CONTRIBUTIONS**

702 Concept and design: M.N., S.S. and M.G.

703 Maintenance and sampling: N.P., M.N. and M.G.

704 Method development and Data acquisition: M.N. and S.S

705 Data analysis and Interpretation: M.N., N.P., B.G. and U.S.

706 Writing and review: M.N., N.P., B.G., U.S., M.G. and S.S

707

## 708 **ACKNOWLEDGEMENTS**

709 This work was supported by Department of Biotechnology (BT/PR15285/AAQ/3/753/2015)  
710 Govt. of India to S.S and M.G. M.N was supported by University Grants Commission (UGC).  
711 We acknowledge ICAR-Central Institute of Fisheries Education, Mumbai for supporting this  
712 work. We acknowledge MASS-FIITB at IIT Bombay supported by the Department of  
713 Biotechnology (BT/PR13114/INF/22/206/2015) for Mass-spectrometric data acquisition.

714 **SUPPLEMENTAL INFORMATION**

715 This article contains six supplementary figures (Figure S1 to S6) and three supplementary  
716 Tables (Table S1 to S3) (.xls).

717

718

719

720

721

722

723

724

725

726

727

728

729

730

731

732

733

734

735

736

737

738

739 **REFERENCES**

740

- 741 1. Assefa A, Abunna F. 2018. Maintenance of Fish Health in Aquaculture: Review of  
742 Epidemiological Approaches for Prevention and Control of Infectious Disease of Fish.  
743 Vet Med Int 2018:5432497.
- 744 2. Sahoo PK, Paul A, Sahoo MK, Sabyasachi P, P RK, Das BK. 2021. Incidences of  
745 Infectious Diseases in Freshwater Aquaculture Farms of Eastern India: A Passive  
746 Surveillance based Study from 2014-2018. J Aquac Res Dev 11:579.
- 747 3. Bebak J, Wagner B, Burnes B, Hanson T. 2015. Farm size, seining practices, and salt  
748 use: Risk factors for *Aeromonas hydrophila* outbreaks in farm-raised catfish, Alabama,  
749 USA. Preventive Veterinary Medicine 118:161–168.
- 750 4. Abdel-Latif HMR, Khafaga AF. 2020. Natural co-infection of cultured Nile tilapia  
751 *Oreochromis niloticus* with *Aeromonas hydrophila* and *Gyrodactylus cichlidarum*  
752 experiencing high mortality during summer. Aquac Res 51:1880–1892.
- 753 5. Dias MKR, Sampaio LS, Proietti-Junior AA, Yoshioka ETO, Rodrigues DP, Rodriguez  
754 AFR, Ribeiro RA, Faria FSEDV, Ozório ROA, Tavares-Dias M. 2016. Lethal dose and  
755 clinical signs of *Aeromonas hydrophila* in *Arapaima gigas* (Arapaimidae), the giant fish  
756 from Amazon. Vet Microbiol 188:12–15.
- 757 6. Najiah M LA. 2014. *Aeromonas hydrophila*: Antimicrobial Susceptibility and  
758 Histopathology of Isolates from Diseased Catfish, *Clarias gariepinus* (Burchell). J  
759 Aquac Res Development 05.
- 760 7. Zhao X-L, Jin Z-H, Di G-L, Li L, Kong X-H. 2019. Molecular characteristics,  
761 pathogenicity and medication regimen of *Aeromonas hydrophila* isolated from common  
762 carp (*Cyprinus carpio* L.). J Vet Med Sci 81:1769–1775.
- 763 8. Pérez-Llarena FJ, Bou G. 2016. Proteomics As a Tool for Studying Bacterial Virulence  
764 and Antimicrobial Resistance. Frontiers in Microbiology 7:410.
- 765 9. Zhang L, Li W, Sun L, Wang Y, Lin Y, Lin X. 2020. Quantitative proteomics reveals  
766 the molecular mechanism of *Aeromonas hydrophila* in enoxacin stress. J Proteomics  
767 211:103561.
- 768 10. Di G, Li H, Zhang C, Zhao Y, Zhou C, Naeem S, Li L, Kong X. 2017. Label-free  
769 proteomic analysis of intestinal mucosa proteins in common carp (*Cyprinus carpio*)  
770 infected with *Aeromonas hydrophila*. Fish Shellfish Immunol 66:11–25.
- 771 11. Zhang H, Song C, Xie J, Ge X, Liu B, Zhang Y, Sun C, Zhou Q, Yang Z. 2018.  
772 Comparative proteomic analysis of hepatic mechanisms of *Megalobrama amblycephala*  
773 infected by *Aeromonas hydrophila*. Fish Shellfish Immunol 82:339–349.
- 774 12. Lü A, Hu X, Wang Y, Shen X, Li X, Zhu A, Tian J, Ming Q, Feng Z. 2014. iTRAQ  
775 analysis of gill proteins from the zebrafish (*Danio rerio*) infected with *Aeromonas*  
776 *hydrophila*. Fish Shellfish Immunol 36:229–239.
- 777 13. Magnadottir B. 2010. Immunological control of fish diseases. Mar Biotechnol (NY)  
778 12:361–379.



- 779 14. Heymann F, Tacke F. 2016. Immunology in the liver--from homeostasis to disease. *Nat*  
780 *Rev Gastroenterol Hepatol* 13:88–110.
- 781 15. He P, Jiang W-D, Liu X-A, Feng L, Wu P, Liu Y, Jiang J, Tan B-P, Yang Q-H, Kuang  
782 S-Y, Tang L, Zhou X-Q. 2020. Dietary biotin deficiency decreased growth performance  
783 and impaired the immune function of the head kidney, spleen and skin in on-growing  
784 grass carp (*Ctenopharyngodon idella*). *Fish Shellfish Immunol* 97:216–234.
- 785 16. Schlömmer C, Brandtner A, Bachler M. 2021. Antithrombin and Its Role in Host  
786 Defense and Inflammation. *Int J Mol Sci* 22:4283.
- 787 17. Al-Madboly LA, Ali SM, Fakharany EME, Ragab AE, Khedr EG, Elokely KM. 2020.  
788 Stress-Based Production, and Characterization of Glutathione Peroxidase and  
789 Glutathione S-Transferase Enzymes From *Lactobacillus plantarum*. *Front Bioeng*  
790 *Biotechnol* 8:78.
- 791 18. Rottner K, Stradal TEB. 2016. How distinct Arp2/3 complex variants regulate actin  
792 filament assembly. *Nat Cell Biol* 18:1–3.
- 793 19. Kodigepalli KM, Bowers K, Sharp A, Nanjundan M. 2015. Roles and regulation of  
794 phospholipid scramblases. *FEBS Lett* 589:3–14.
- 795 20. Pahari S, Negi S, Aqdas M, Arnett E, Schlesinger LS, Agrewala JN. 2020. Induction of  
796 autophagy through CLEC4E in combination with TLR4: an innovative strategy to  
797 restrict the survival of *Mycobacterium tuberculosis*. *Autophagy* 16:1021–1043.
- 798 21. Kim M, Otsubo R, Morikawa H, Nishide A, Takagi K, Sasakawa C, Mizushima T.  
799 2014. Bacterial effectors and their functions in the ubiquitin-proteasome system: insight  
800 from the modes of substrate recognition. *Cells* 3:848–864.
- 801 22. Chen L, Li J, Yang G. 2020. A comparative review of intelectins. *Scandinavian Journal*  
802 *of Immunology* 92:e12882.
- 803 23. Yin L, Ma H, Nakayasu ES, Payne SH, Morris DR, Harwood CS. 2019. Bacterial  
804 Longevity Requires Protein Synthesis and a Stringent Response. *mBio* 10:e02189-19.
- 805 24. Zanlungo S, Amigo L, Mendoza H, Miquel JF, Vío C, Glick JM, Rodríguez A,  
806 Kozarsky K, Quiñones V, Rigotti A, Nervi F. 2000. Sterol carrier protein 2 gene transfer  
807 changes lipid metabolism and enterohepatic sterol circulation in mice. *Gastroenterology*  
808 119:1708–1719.
- 809 25. Bedi B, Maurice NM, Ciavatta VT, Lynn KS, Yuan Z, Molina SA, Joo M, Tyor WR,  
810 Goldberg JB, Koval M, Hart CM, Sadikot RT. 2017. Peroxisome proliferator-activated  
811 receptor- $\gamma$  agonists attenuate biofilm formation by *Pseudomonas aeruginosa*. *FASEB J*  
812 31:3608–3621.
- 813 26. Zhang J, Yao J, Wang R, Zhang Y, Liu S, Sun L, Jiang Y, Feng J, Liu N, Nelson D,  
814 Waldbieser G, Liu Z. 2014. The cytochrome P450 genes of channel catfish: Their  
815 involvement in disease defense responses as revealed by meta-analysis of RNA-Seq  
816 data sets. *Biochimica et Biophysica Acta (BBA) - General Subjects* 1840:2813–2828.

- 817 27. Hal AM, El-Barbary MI. 2020. Gene expression and histopathological changes of Nile  
818 tilapia (*Oreochromis niloticus*) infected with *Aeromonas hydrophila* and *Pseudomonas*  
819 *fluorescens*. *Aquaculture* 526:735392.
- 820 28. Benej M, Danchenko M, Oveckova I, Cervenak F, Tomaska L, Grossmannova K,  
821 Polcicova K, Golias T, Tomaskova J. 2019. Quantitative Proteomics Reveal  
822 Peroxiredoxin Perturbation Upon Persistent Lymphocytic Choriomeningitis Virus  
823 Infection in Human Cells. *Frontiers in Microbiology* 10:2438.
- 824 29. Scarl RT, Lawrence CM, Gordon HM, Nunemaker CS. 2017. STEAP4: its emerging  
825 role in metabolism and homeostasis of cellular iron and copper. *Journal of*  
826 *Endocrinology* 234:R123–R134.
- 827 30. Kumar G, Hummel K, Noebauer K, Welch TJ, Razzazi-Fazeli E, El-Matbouli M. 2018.  
828 Proteome analysis reveals a role of rainbow trout lymphoid organs during *Yersinia*  
829 *ruckeri* infection process. *Sci Rep* 8:13998.
- 830 31. Newton P, Thomas DR, Reed SCO, Lau N, Xu B, Ong SY, Pasricha S,  
831 Madhamshettiwar PB, Edgington-Mitchell LE, Simpson KJ, Roy CR, Newton HJ. 2020.  
832 Lysosomal degradation products induce *Coxiella burnetii* virulence. *Proc Natl Acad Sci*  
833 *U S A* 117:6801–6810.
- 834 32. Szulc-Dąbrowska L, Bossowska-Nowicka M, Struzik J, Toka FN. 2020. Cathepsins in  
835 Bacteria-Macrophage Interaction: Defenders or Victims of Circumstance? *Front Cell*  
836 *Infect Microbiol* 10:601072.
- 837 33. Schwartz SL, Cao C, Pylypenko O, Rak A, Wandinger-Ness A. 2008. Rab GTPases at a  
838 glance. *Journal of Cell Science* 121:246–246.
- 839 34. Ullah MO, Sweet MJ, Mansell A, Kellie S, Kobe B. 2016. TRIF-dependent TLR  
840 signaling, its functions in host defense and inflammation, and its potential as a  
841 therapeutic target. *Journal of Leukocyte Biology* 100:27–45.
- 842 35. Samanta M, Basu M, Swain B, Panda P, Jayasankar P. 2013. Molecular cloning and  
843 characterization of Toll-like receptor 3, and inductive expression analysis of type I IFN,  
844 Mx and pro-inflammatory cytokines in the Indian carp, rohu (*Labeo rohita*). *Mol Biol*  
845 *Rep* 40:225–235.
- 846 36. Lin K, Ge H, Lin Q, Wu J, He L, Fang Q, Zhou C, Sun M, Huang Z. 2013. Molecular  
847 characterization and functional analysis of Toll-like receptor 3 gene in orange-spotted  
848 grouper (*Epinephelus coioides*). *Gene* 527:174–182.
- 849 37. Meijer AH, Gabby Krens SF, Medina Rodriguez IA, He S, Bitter W, Ewa Snaar-  
850 Jagalska B, Spaik HP. 2004. Expression analysis of the Toll-like receptor and TIR  
851 domain adaptor families of zebrafish. *Mol Immunol* 40:773–783.
- 852 38. Baoprasertkul P, Peatman E, Somridhivej B, Liu Z. 2006. Toll-like receptor 3 and  
853 TICAM genes in catfish: species-specific expression profiles following infection with  
854 *Edwardsiella ictaluri*. *Immunogenetics* 58:817–830.
- 855 39. Rodriguez MF, Wiens GD, Purcell MK, Palti Y. 2005. Characterization of Toll-like  
856 receptor 3 gene in rainbow trout (*Oncorhynchus mykiss*). *Immunogenetics* 57:510–519.

- 857 40. Song P, Zheng N, Zhang L, Liu Y, Chen T, Bao C, Li Z, Yong W, Zhang Y, Wu C, Wu  
858 Z. 2017. Downregulation of Interferon- $\beta$  and Inhibition of TLR3 Expression are  
859 associated with Fatal Outcome of Severe Fever with Thrombocytopenia Syndrome. *Sci*  
860 *Rep* 7:6532.
- 861 41. Bonnin M, Fares N, Testoni B, Estornes Y, Weber K, Vanbervliet B, Lefrançois L,  
862 Garcia A, Kfoury A, Pez F, Coste I, Saintigny P, Viari A, Lang K, Guey B, Hervieu V,  
863 Bancel B, Bartoch B, Durantel D, Renno T, Merle P, Lebecque S. 2019. Toll-like  
864 receptor 3 downregulation is an escape mechanism from apoptosis during  
865 hepatocarcinogenesis. *J Hepatol* 71:763–772.
- 866 42. Yuan M-M, Xu Y-Y, Chen L, Li X-Y, Qin J, Shen Y. 2015. TLR3 expression correlates  
867 with apoptosis, proliferation and angiogenesis in hepatocellular carcinoma and predicts  
868 prognosis. *BMC Cancer* 15:245.
- 869 43. Drouin M, Saenz J, Chiffolleau E. 2020. C-Type Lectin-Like Receptors: Head or Tail in  
870 Cell Death Immunity. *Front Immunol* 11:251.
- 871 44. Park Y-J, Yoo S-A, Kim M, Kim W-U. 2020. The Role of Calcium-Calcineurin-NFAT  
872 Signaling Pathway in Health and Autoimmune Diseases. *Front Immunol* 11:195.
- 873 45. Long M, Zhao J, Li T, Tafalla C, Zhang Q, Wang X, Gong X, Shen Z, Li A. 2015.  
874 Transcriptomic and proteomic analyses of splenic immune mechanisms of rainbow trout  
875 (*Oncorhynchus mykiss*) infected by *Aeromonas salmonicida* subsp. *salmonicida*. *J*  
876 *Proteomics* 122:41–54.
- 877 46. Ros S, Schulze A. 2013. Balancing glycolytic flux: the role of 6-phosphofructo-2-  
878 kinase/fructose 2,6-bisphosphatases in cancer metabolism. *Cancer & Metabolism* 1:8.
- 879 47. Wolfe AL, Zhou Q, Toska E, Galeas J, Ku AA, Koche RP, Bandyopadhyay S, Scaltriti  
880 M, Lebrilla CB, McCormick F, Kim SE. 2021. UDP-glucose pyrophosphorylase 2, a  
881 regulator of glycogen synthesis and glycosylation, is critical for pancreatic cancer  
882 growth. *PNAS* 118.
- 883 48. Ma J, Wei K, Liu J, Tang K, Zhang H, Zhu L, Chen J, Li F, Xu P, Chen J, Liu J, Fang  
884 H, Tang L, Wang D, Zeng L, Sun W, Xie J, Liu Y, Huang B. 2020. Glycogen  
885 metabolism regulates macrophage-mediated acute inflammatory responses. *Nat*  
886 *Commun* 11:1769.
- 887 49. Vaupel P, Schmidberger H, Mayer A. 2019. The Warburg effect: essential part of  
888 metabolic reprogramming and central contributor to cancer progression. *Int J Radiat*  
889 *Biol* 95:912–919.
- 890 50. Shi L, Salamon H, Eugenin EA, Pine R, Cooper A, Gennaro ML. 2015. Infection with  
891 *Mycobacterium tuberculosis* induces the Warburg effect in mouse lungs. *Sci Rep*  
892 5:18176.
- 893 51. Wentzel AS, Janssen JJE, de Boer VCJ, van Veen WG, Forlenza M, Wiegertjes GF.  
894 2020. Fish Macrophages Show Distinct Metabolic Signatures Upon Polarization.  
895 *Frontiers in Immunology* 11:152.

- 896 52. Park J-H, Shim D, Kim KES, Lee W, Shin SJ. 2021. Understanding Metabolic  
897 Regulation Between Host and Pathogens: New Opportunities for the Development of  
898 Improved Therapeutic Strategies Against *Mycobacterium tuberculosis* Infection.  
899 *Frontiers in Cellular and Infection Microbiology* 11:212.
- 900 53. Williams NC, O'Neill LAJ. 2018. A Role for the Krebs Cycle Intermediate Citrate in  
901 Metabolic Reprogramming in Innate Immunity and Inflammation. *Frontiers in*  
902 *Immunology* 9:141.
- 903 54. Gleeson LE, Sheedy FJ. 2016. Metabolic reprogramming & inflammation: Fuelling the  
904 host response to pathogens. *Semin Immunol* 28:450–468.
- 905 55. Libbing CL, McDevitt AR, Azcueta R-MP, Ahila A, Mulye M. 2019. Lipid Droplets: A  
906 Significant but Understudied Contributor of Host–Bacterial Interactions. *Cells* 8:E354.
- 907 56. Reddy AT, Lakshmi SP, Reddy RC. 2016. PPAR $\gamma$  in Bacterial Infections: A Friend or  
908 Foe? *PPAR Research* 2016:e7963540.
- 909 57. Chou W-L, Chuang L-M, Chou C-C, Wang AH-J, Lawson JA, FitzGerald GA, Chang  
910 Z-F. 2007. Identification of a novel prostaglandin reductase reveals the involvement of  
911 prostaglandin E2 catabolism in regulation of peroxisome proliferator-activated receptor  
912 gamma activation. *J Biol Chem* 282:18162–18172.
- 913 58. Chen I-J, Hee S-W, Liao C-H, Lin S-Y, Su L, Shun C-T, Chuang L-M. 2018. Targeting  
914 the 15-keto-PGE2-PTGR2 axis modulates systemic inflammation and survival in  
915 experimental sepsis. *Free Radical Biology and Medicine* 115:113–126.
- 916 59. Tannahill GM, Curtis AM, Adamik J, Palsson-McDermott EM, McGettrick AF, Goel G,  
917 Frezza C, Bernard NJ, Kelly B, Foley NH, Zheng L, Gardet A, Tong Z, Jany SS, Corr  
918 SC, Haneklaus M, Caffrey BE, Pierce K, Walmsley S, Beasley FC, Cummins E, Nizet  
919 V, Whyte M, Taylor CT, Lin H, Masters SL, Gottlieb E, Kelly VP, Clish C, Auron PE,  
920 Xavier RJ, O'Neill L a. J. 2013. Succinate is an inflammatory signal that induces IL-1 $\beta$   
921 through HIF-1 $\alpha$ . *Nature* 496:238–242.
- 922 60. O'Neill LAJ, Kishton RJ, Rathmell J. 2016. A guide to immunometabolism for  
923 immunologists. *Nat Rev Immunol* 16:553–565.
- 924 61. Stackebrandt E, Goebel BMY 1994. 1994. Taxonomic Note: A Place for DNA-DNA  
925 Reassociation and 16S rRNA Sequence Analysis in the Present Species Definition in  
926 Bacteriology. *International Journal of Systematic and Evolutionary Microbiology*  
927 44:846–849.
- 928 62. Chu W-H, Lu C-P. 2005. Multiplex PCR assay for the detection of pathogenic  
929 *Aeromonas hydrophila*. *J Fish Dis* 28:437–441.
- 930 63. Siriyappagounder P, Shankar KM, Naveen Kumar BT, Patil R, Byadgi OV. 2014.  
931 Evaluation of biofilm of *Aeromonas hydrophila* for oral vaccination of *Channa striatus*.  
932 *Fish Shellfish Immunol* 41:581–585.
- 933 64. Scopes RK. 1974. Measurement of protein by spectrophotometry at 205 nm. *Anal*  
934 *Biochem* 59:277–282.

- 935 65. Pang Z, Chong J, Zhou G, de Lima Morais DA, Chang L, Barrette M, Gauthier C,  
936 Jacques P-É, Li S, Xia J. 2021. MetaboAnalyst 5.0: narrowing the gap between raw  
937 spectra and functional insights. *Nucleic Acids Res* 49:W388–W396.
- 938 66. Goedhart J, Luijsterburg MS. 2020. VolcanoR is a web app for creating, exploring,  
939 labeling and sharing volcano plots. *Sci Rep* 10:20560.
- 940 67. Huerta-Cepas J, Szklarczyk D, Heller D, Hernández-Plaza A, Forslund SK, Cook H,  
941 Mende DR, Letunic I, Rattei T, Jensen LJ, von Mering C, Bork P. 2019. eggNOG 5.0: a  
942 hierarchical, functionally and phylogenetically annotated orthology resource based on  
943 5090 organisms and 2502 viruses. *Nucleic Acids Research* 47:D309–D314.
- 944 68. Szklarczyk D, Gable AL, Nastou KC, Lyon D, Kirsch R, Pyysalo S, Doncheva NT,  
945 Legeay M, Fang T, Bork P, Jensen LJ, von Mering C. 2021. The STRING database in  
946 2021: customizable protein–protein networks, and functional characterization of user-  
947 uploaded gene/measurement sets. *Nucleic Acids Research* 49:D605–D612.
- 948 69. Zhou Y, Zhou B, Pache L, Chang M, Khodabakhshi AH, Tanaseichuk O, Benner C,  
949 Chanda SK. 2019. Metascape provides a biologist-oriented resource for the analysis of  
950 systems-level datasets. *Nat Commun* 10:1523.
- 951 70. MacLean B, Tomazela DM, Shulman N, Chambers M, Finney GL, Frewen B, Kern R,  
952 Tabb DL, Liebler DC, MacCoss MJ. 2010. Skyline: an open source document editor for  
953 creating and analyzing targeted proteomics experiments. *Bioinformatics* 26:966–968.
- 954 71. Spitzer M, Wildenhain J, Rappsilber J, Tyers M. 2014. BoxPlotR: a web tool for  
955 generation of box plots. *Nat Methods* 11:121–122.

956

957

958

959

960

961

962

963

964

965

966

967

968

## 969 **FIGURE LEGENDS**

970 **Figure 1| Overview of sample collection and experimental workflow:** (A) Rohu collected  
971 from the outbreak farm was screened, kidney sample was streaked onto TSA plate; identical  
972 colonies were selected from TSA plate followed by DNA isolation, targeted Polymerase Chain  
973 Reaction (PCR) for 16sRNA gene and sequencing for identification of bacteria. To re-confirm  
974 MT374248 isolated strain, *A. hydrophila* from MTCC culture (1739T) was used. For challenge  
975 study, Phosphate Buffer saline (PBS) and *A. hydrophila* was injected intraperitoneally to  
976 Control and AH group (*Ah* challenged) respectively. After 48h of infection, fish were  
977 euthanized and liver samples were collected (Details in text). (B) For proteomics analysis,  
978 tissues were lysed in Sodium dodecyl sulphate (SDS) containing buffer followed by protein  
979 digestion using filter assisted sample preparation (FASP) method. Peptide samples were  
980 cleaned before subjecting to mass spectrometry for Data dependent acquisition (DDA). (C)  
981 Acquired raw mass spectrometry data (.raw) was analysed using MaxQuant software for  
982 identification and quantification of proteins. Statistical analysis was performed to identify the  
983 differentially expressed proteins followed by functional analysis. (D) Targeted proteomic  
984 validation of selected proteins using selected reaction monitoring was done where peptide  
985 sample was subjected to High performance liquid chromatography (HPLC) followed by target  
986 precursor and transition selection in Triple quadrupole mass spectrometer for acquisition of  
987 spectral data. SRM data was analysed using Skyline software where targeted data was  
988 compared with Spectral library prepared from DDA data.

989  
990 **Figure 2| Shotgun proteomic analysis reveals altered host proteomic signatures in liver**  
991 **during *Ah* infection:** (A) Volcano plot depicting significantly altered protein candidates (Fold  
992 Change 1.5,  $p \leq 0.05$ ), where red and blue colours represent upregulated and downregulated  
993 proteins respectively. (B) Top 30 altered key proteins found on the basis of VIP Score. (C)  
994 Heatmap showing differential expression (abundances) of top 30 significant proteins (Student  
995 t-test,  $p \leq 0.05$ ) across 4 replicates of control tissues (C-1, 2, 3, 4) and 3 replicates of *Ah* infected  
996 tissues (AH-2, 3, 4). (D) Bar graphs representing altered abundances of six functionally  
997 important proteins (three up and three downregulated) across Control and AH group. (E)  
998 Pathway enrichment network (using Metascape) showing functional annotation of protein  
999 coding genes. Each gene ontology (GO) and/ or pathway term is represented by a circle node,  
1000 where its size is proportional to the number of input genes mapped to that GO term, and nodes  
1001 present within specific circle belong to the same cluster. Terms with a similarity score  $> 0.3$   
1002 are linked by an edge (the thickness of the edge represents the similarity score). Color codes  
1003 for pie sector represents attributes of genes from two input lists i.e., red and blue colour  
1004 represent number of gene candidates mapped from list 1 (DR\_Control: downregulated  
1005 significant and Control enriched proteins) and list 2 (UR\_AH: upregulated significant and  
1006 disease enriched protein set), respectively.

1007  
1008 **Figure 3| Landscape of altered pathways and interaction networks during *Ah***  
1009 **pathogenesis:** (A) Interaction map depicting Protein-Protein interaction between significantly  
1010 downregulated proteins and their involvement in altered pathways (based on STRING  
1011 analysis). Bar plots showing differential protein abundance (intensity) for a few downregulated  
1012 proteins (Cyp1a, Dpyd, Chuk, Cltc and Ctsf) from different pathways, based on label-free  
1013 quantification (LFQ) (B) PPI enrichment analysis reveals top Molecular Complex Detection  
1014 (MCODE) network components i.e., mRNA metabolism and Endocytosis among significant  
1015 downregulated proteins and disease enriched proteins (based on Metascape analysis). (C)  
1016 Protein-Protein interaction for significant upregulated proteins and their respective altered  
1017 pathways during infections (STRING). Bar plots showing differential protein abundance

1018 (intensity) for a few upregulated proteins (Psm5, Atp5j, Cs, Suclg2 and Fabp (Fabp1) from  
1019 different pathways, based on LFQ analysis. **(D)** PPI enrichment analysis reveals top MCODE  
1020 network components i.e., Translation and Proteasome among significant upregulated proteins  
1021 and disease enriched proteins (Metascape).

1022

1023 **Figure 4| Experimental validation using targeted approach for changes in protein**  
1024 **abundance during *Ah* infection: (A-C)** Boxplots, peak area intensities and Peak shapes for  
1025 downregulated proteins viz. Bdh1, Chuk and Ugp2, respectively and **(D)** Boxplot, peak area  
1026 intensity and Peak shape for upregulated protein i.e., Atp5j in the AH condition (Ah infected  
1027 group) compared to the control condition. In each figure (Left-Right), Upper panel represents  
1028 the protein wise intensities based on the shotgun analysis (DDA abundance) and the targeted  
1029 analysis (MRM intensity), respectively for each AH and Control condition showing similar  
1030 trend in both the analyses. Lower panel shows the bar plots for peak area (with dot product  
1031 (dotp) value based on match with spectral library) and spectral peak group comparison for a  
1032 representative peptide of the same protein. Different colors in the bar plots and spectral peaks  
1033 (in lower panel) represent different product ions of the same peptide.

1034

1035 **Figure 5| Schematic representation of interplay between host defence and pathogen**  
1036 **survival during *Ah* infection in *L. rohita*:** **(A)** Once the *Ah* bacterium (*A. hydrophila*) is  
1037 engulfed by the host cell through phagosome, it undergoes a series of transformations by  
1038 interacting with the subcompartments of the phagocytotic pathway and finally becomes  
1039 phagolysosome after fusing with lysosome. During the process, the phagosome becomes highly  
1040 acidic through proton pumping by VATPase, which is essential for the intracellular killing of  
1041 microbe. Material that is not useful is exported through exocytosis. In the infected host cell,  
1042 several proteins involved in phagocytosis-exocytosis pathway include Rab proteins, clathrin,  
1043 lysosomal-associated membrane proteins (LAMP), lysosomal integral membrane protein  
1044 (Scrab2), VATPase, hydrolases and proteases (cathepsin, Tpp1). During *Ah* infection, many of  
1045 the host proteins are dysregulated, and this may help bacteria survive inside the host cells. **(B)**  
1046 During *Ah* infection, bacteria may escape autophagy and apoptosis of infected cell by affecting  
1047 Toll like receptor (TLR3) and C-reactive lectin (CLEC4e) mediated signalling. TLR and  
1048 CLEC4 identify pathogen associated molecular patterns to activate signaling cascades for  
1049 inflammatory and antimicrobial effects including apoptosis. TLR3 stimulates the TRIF  
1050 mediated signaling involving TRAF that finally activates MAP kinase (MEK1/2), NF-Kb or  
1051 Activator protein (AP) pathways. CLEC4e works through ITAM-tyrosine kinase SYK pathway  
1052 to activate signaling cascade through PLC $\gamma$ 2 for inducing the NFAT/ calcineurin pathway. **(C)**  
1053 During *Ah* infection, host (immune) cells undergo metabolic reprogramming that may be  
1054 beneficial for inflammatory host response. The increase in the rate of glycolysis in the host cell  
1055 degrades glucose into pyruvate through a series of reactions. Expression of glycolysis linked  
1056 enzymes (Pfk2, Eno1, Ugp2) supports glycolytic flux to form pyruvate. Pyruvate enters into  
1057 the Citric acid cycle (TCA). Infection mediated metabolic reprogramming leads to functional  
1058 breaks in the TCA cycle which favour the accumulation of Citrate and Succinate. Downstream  
1059 metabolite of Citrate (Itaconate) inhibits SDH activity that further increases Succinate. These  
1060 metabolites increase the mitochondrial reactive oxygen species (mROS) and (Nitric oxide) that  
1061 have inflammatory effects. Succinate accumulation and redox-environment changes in  
1062 mitochondria interfere with electron transport chain and stabilise the HIF-1 $\alpha$  leading to the  
1063 expression of MHC Class II and IL-1 $\beta$ . Activated HIF-1 $\alpha$  and IL-1 $\beta$  further increase glycolysis  
1064 and lactate production by increasing Lactate dehydrogenase activity. Fatty acid synthesis  
1065 increases as a result of Citrate accumulation in cytosol and is required for energy homeostasis  
1066 and inflammation that may be utilised by the bacteria. In the late infection stage, PPAR  
1067 signaling gets activated and regulates the ROS mediated apoptosis and anti-inflammatory

1068 response. (Single red down arrow- Down regulated protein, Double red down arrow- Protein  
1069 enriched in controls and not detected/quantified in AH group, Single green up arrow-  
1070 Upregulated protein, Double green up arrow- Protein enriched in AH group and not  
1071 detected/quantified in Control group).

1072

1073

1074

1075

1076

1077

1078

1079



**Figure 1**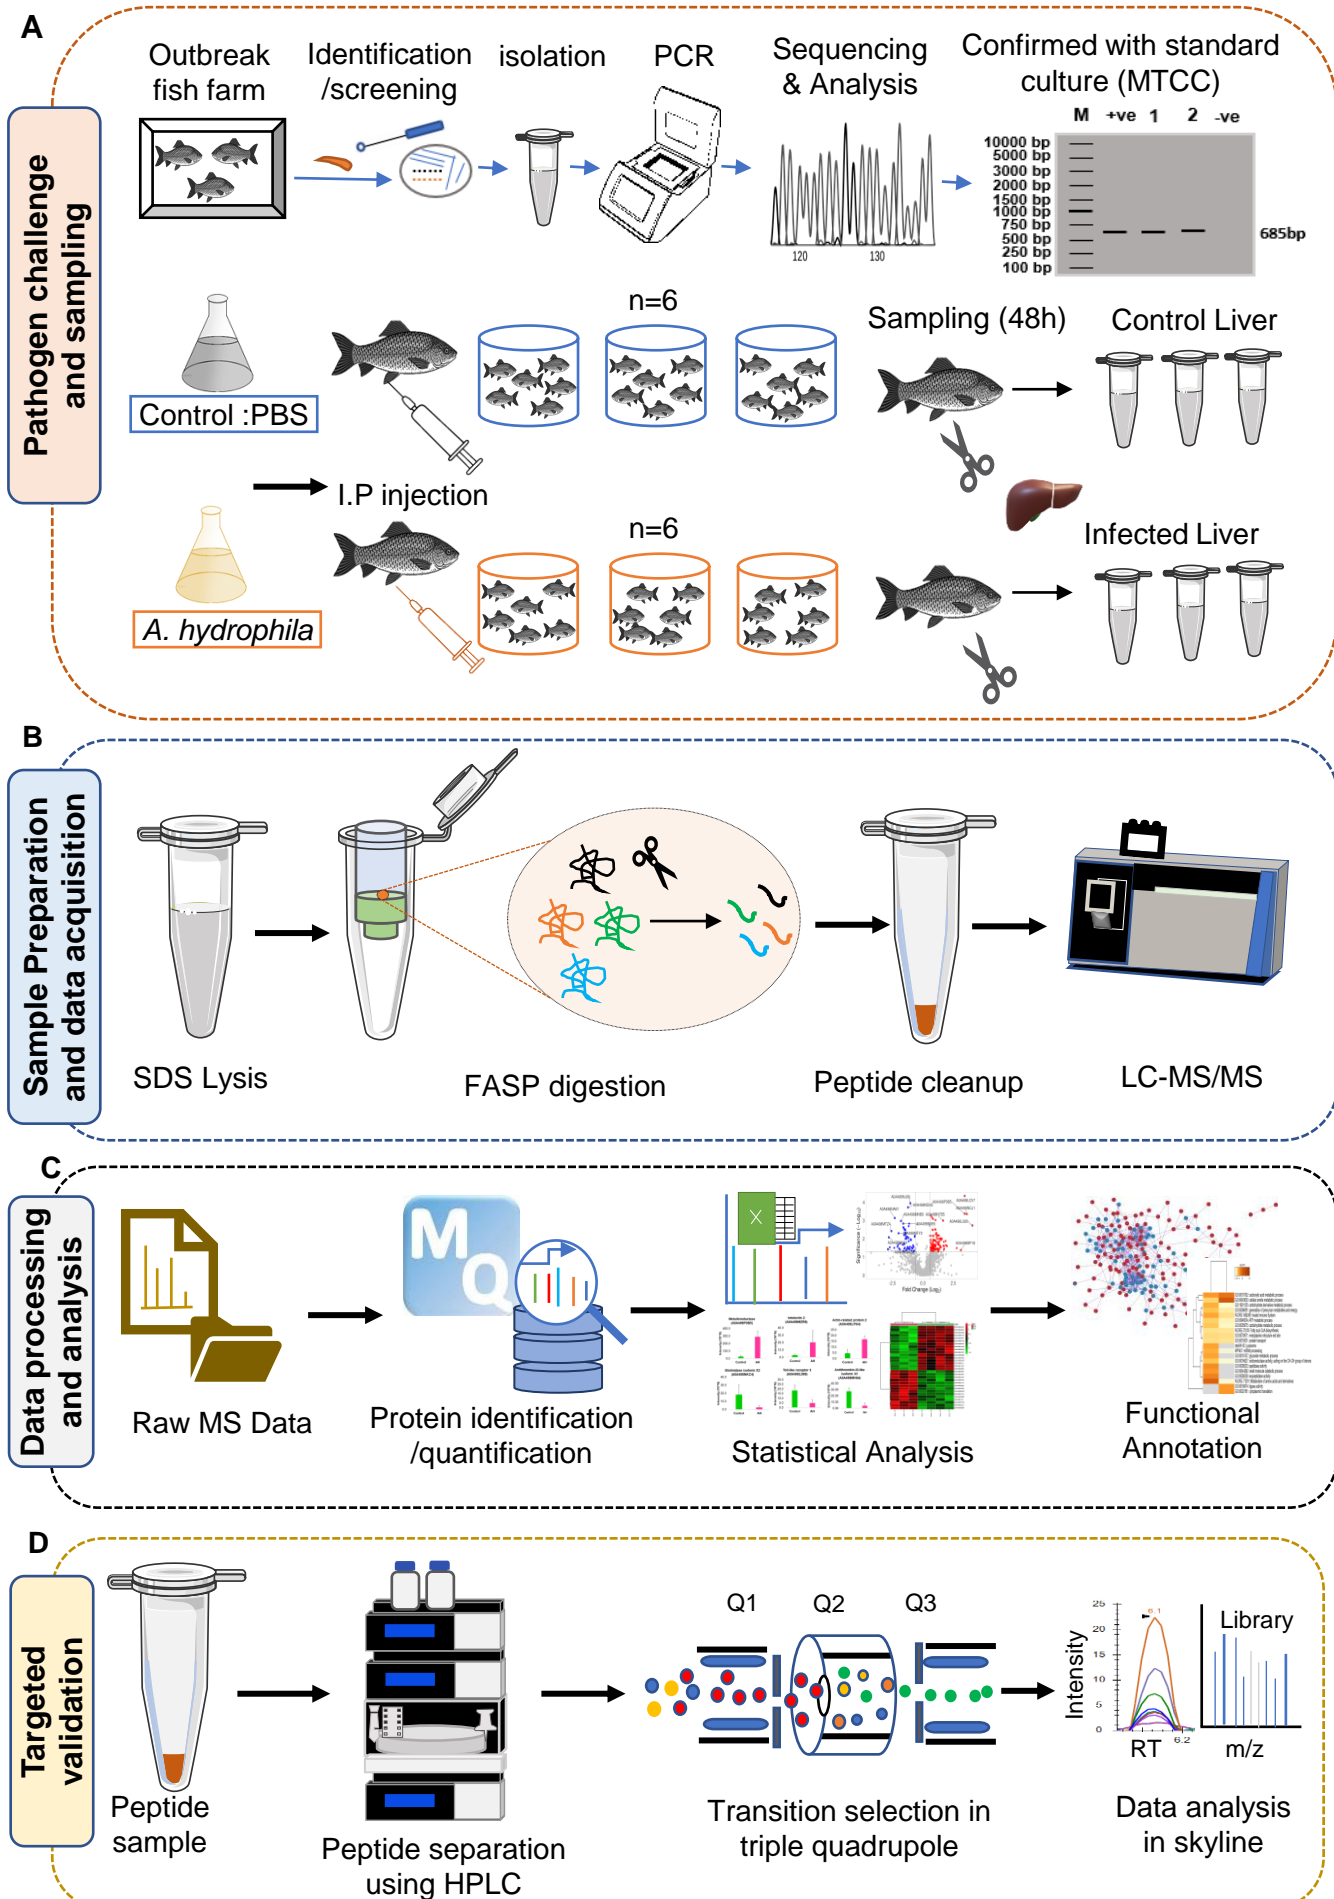

**Figure 2**

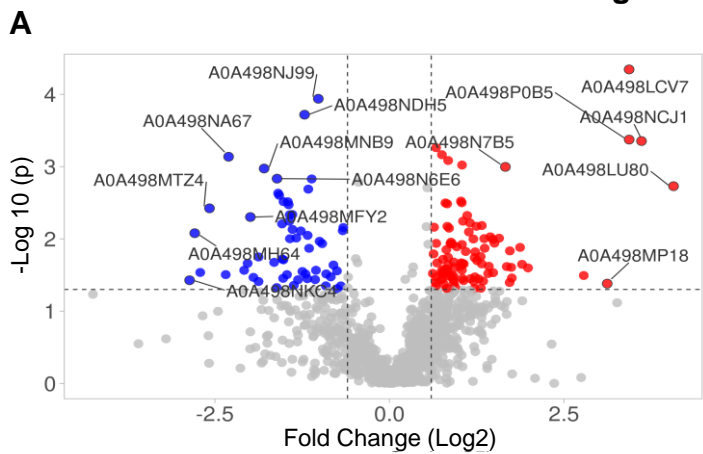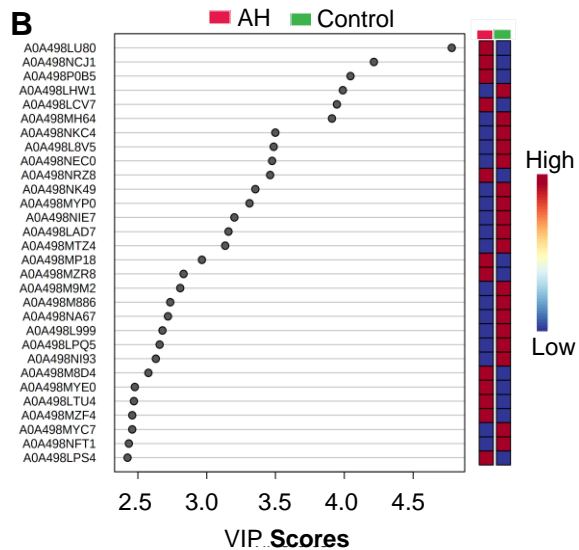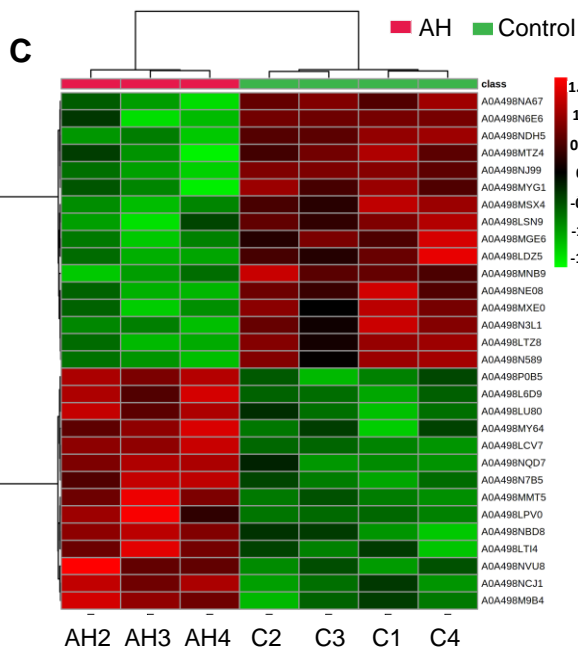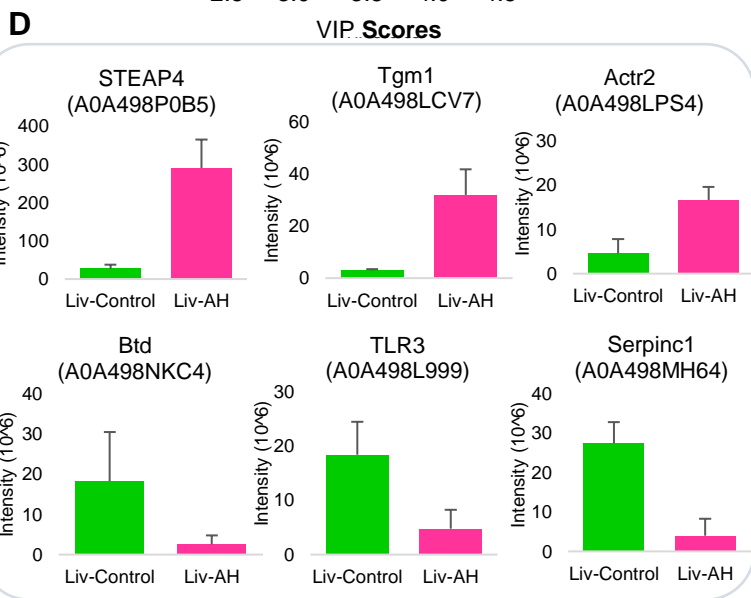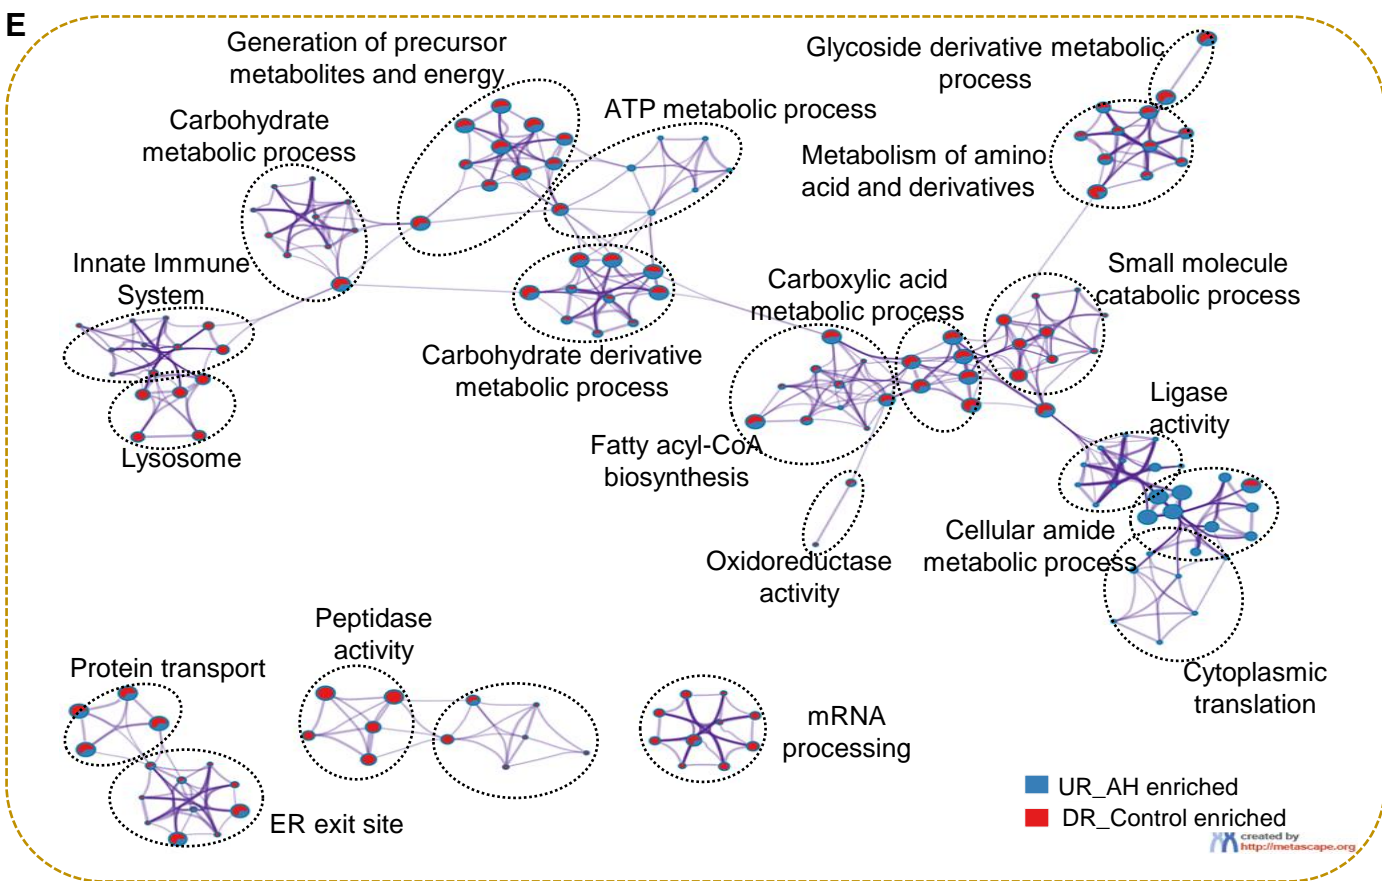

**Figure 3**

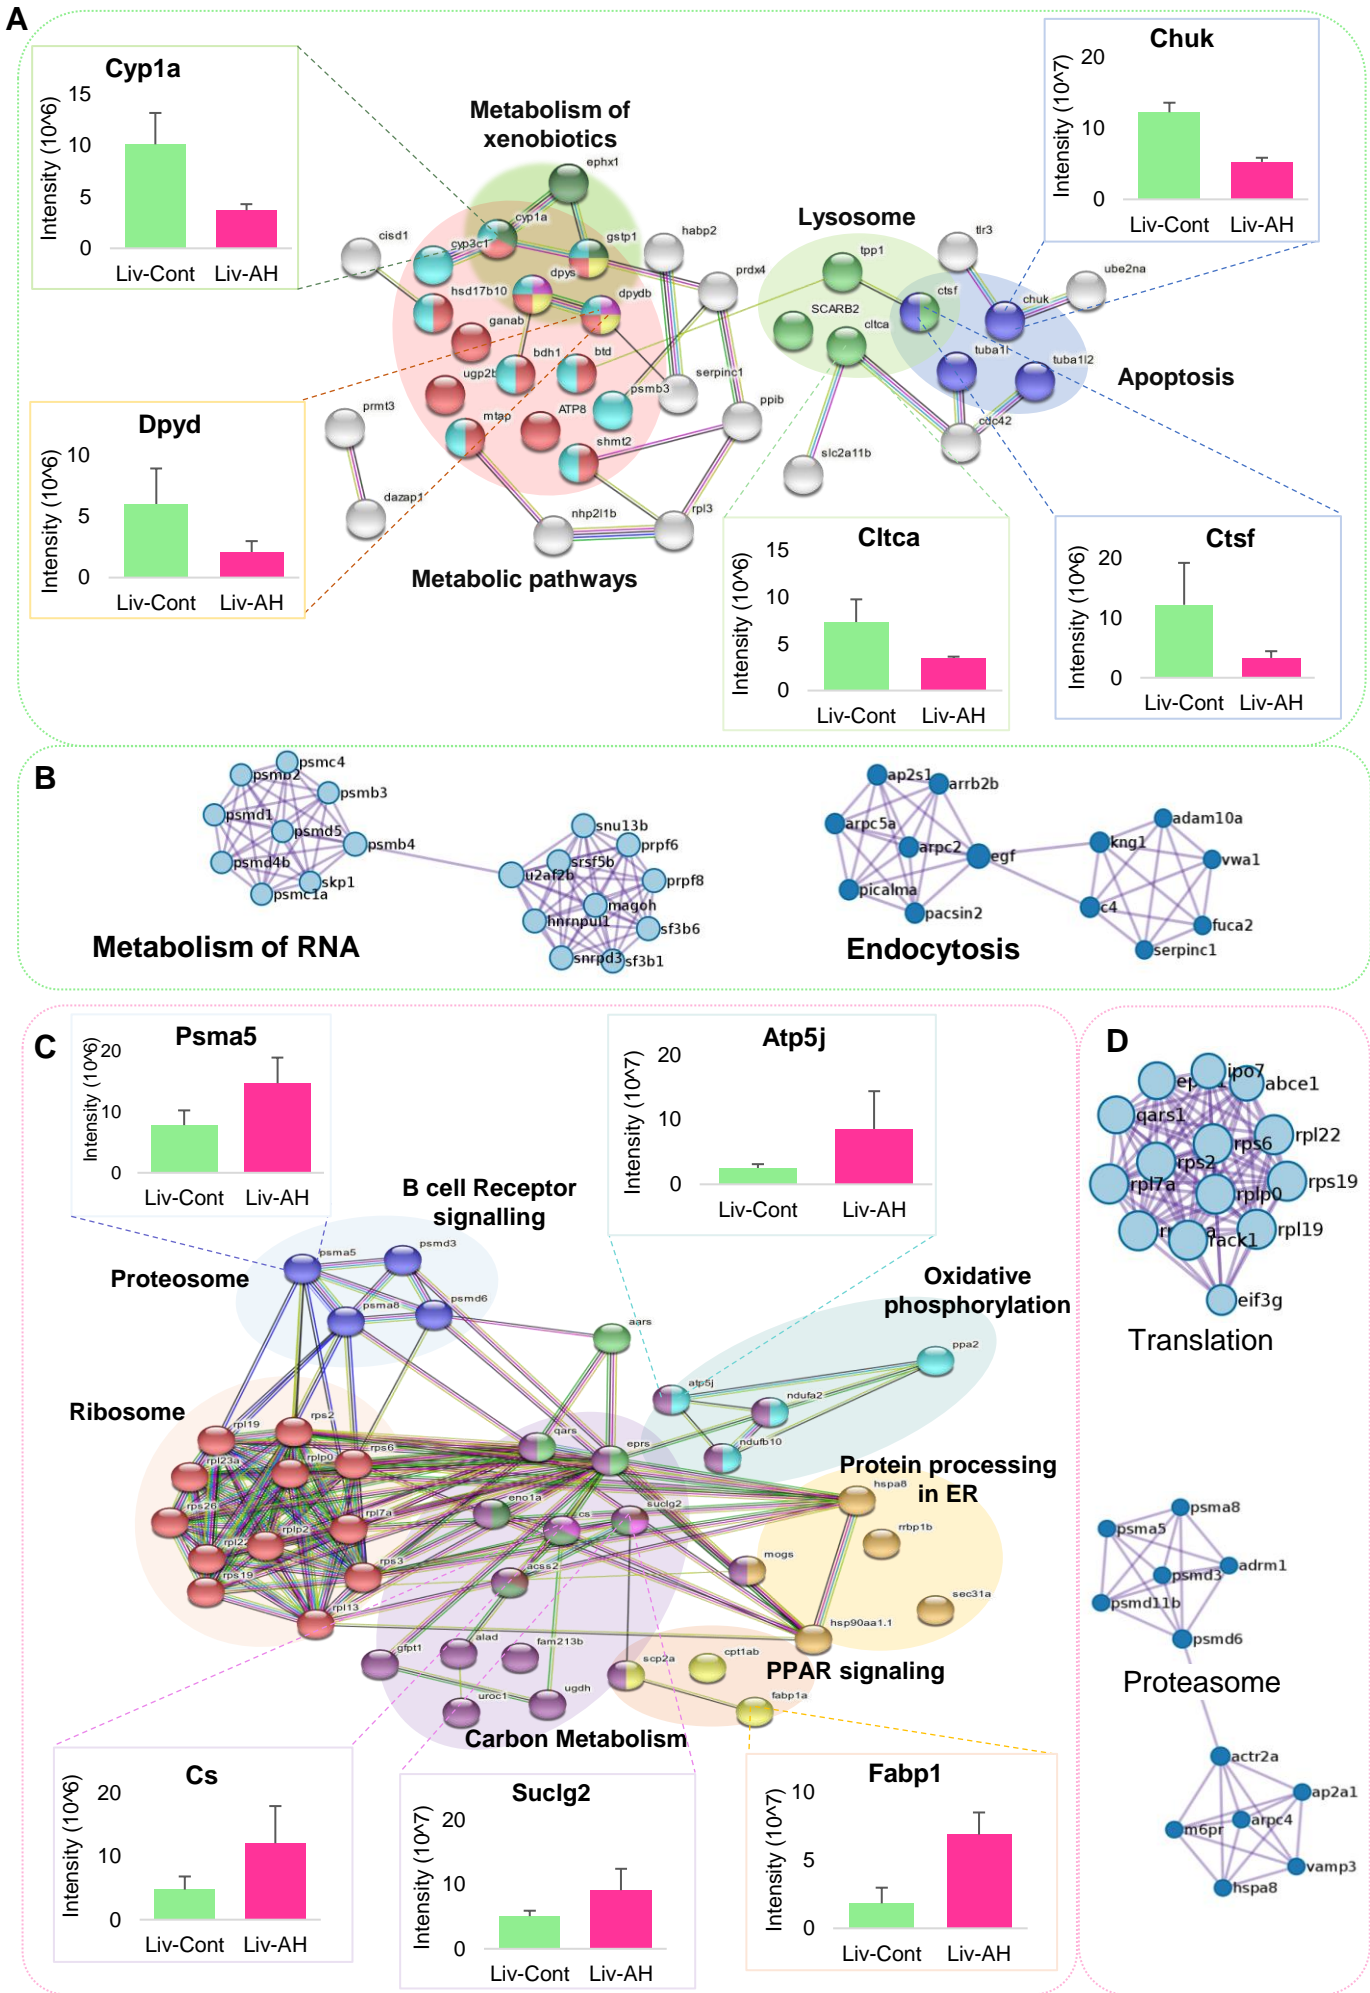

Figure 4

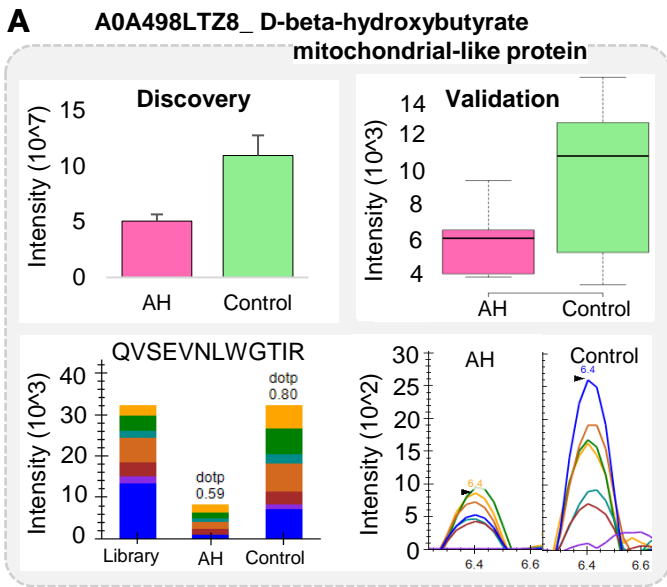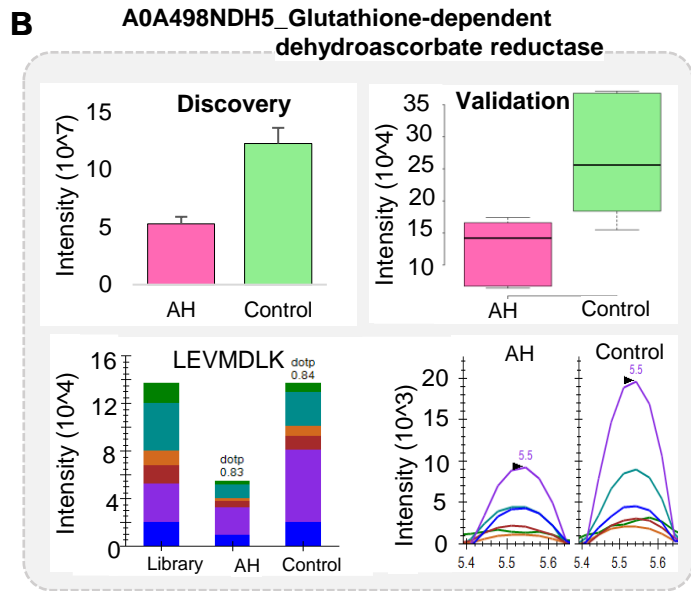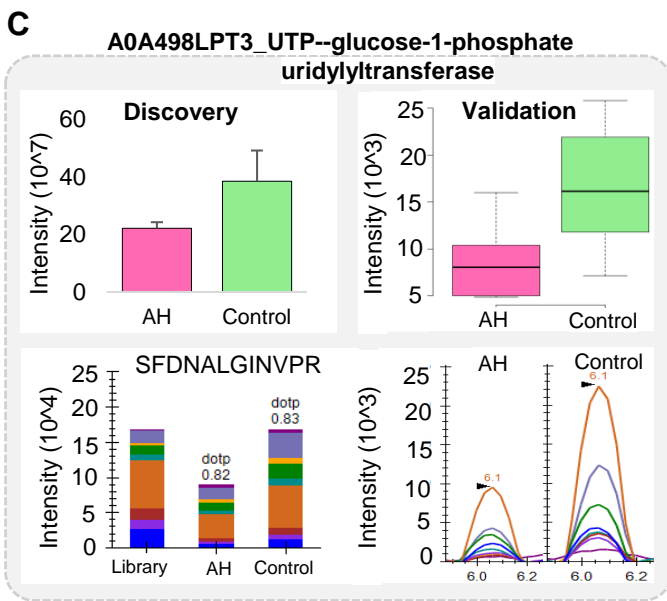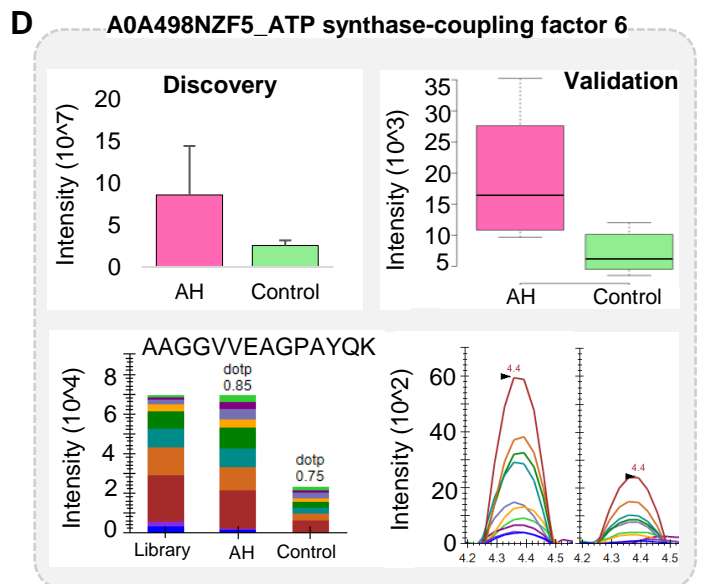

Source: https://www.biorxiv.org/content/10.1101/2021.11.16.468918v1.full.pdf
